# Supplementary material for: Making Mosquito Taxonomy Useful: A Stable Classification of Tribe Aedini that Balances Utility with Current Knowledge of Evolutionary Relationships
Source: PubMed Central journal article supplement (PMC4520491; doi:10.1371/journal.pone.0133602), 2015-07-30
Supplement: pone.0133602.s001.pdf [file pone.0133602.s001.pdf]

**Appendix S1. Tribe Aedini generic, subgeneric and species names proposed herein.** As appropriate, species endings are written to agree in gender with their respective genera and author parentheses are provided for species described in a genus different than in the current classification.

**Genus *Aedes***

Subgenus *Abraedes* Zavortink, 1970

*papago* Zavortink, 1970

Subgenus *Acartomyia* Theobald, 1903

*mariae* (Sergent & Sergent, 1903)  
*phoeniciae* Coluzzi & Sabatini, 1968  
*zammitii* (Theobald, 1903)

Subgenus *Aedes* Meigen, 1818

*alexandrei* Gornostaeva, 2005  
*cinereus* Meigen, 1818  
*dahuricus* Danilov, 1987  
*dmitryi* Gornostaeva, 2005  
*esoensis* Yamada, 1921  
*geminus* Peus, 1970  
*mubiensis* Luh & Shih, 1958  
*nataliae* Gornostaeva, 2005  
*rossicus* Dolbeskin, Gorickaja & Mitrofanova, 1930  
*sasai* Tanaka, Mizusawa & Saugstad, 1975  
*valeryi* Gornostaeva, 2005  
*yamadai* Sasa, Kano & Takahasi, 1950

Subgenus *Aedimorphus* Theobald, 1903

*abnormalis* (Theobald, 1909)  
*abnormalis kabwachensis* Edwards, 1941  
*aerarius* McIntosh, 1975  
*albodorsalis* Fontenille & Brunhes, 1985  
*alboscuteatus* (Theobald, 1905)  
*alboventralis* (Theobald, 1910)  
*argenteoscutellatus* Carter & Wijesundara, 1948  
*bambiotai* Geoffroy, 1987  
*bancoi* Geoffroy, 1987

*bevisi* (Edwards, 1915)  
*caecus* (Theobald, 1901)  
*caliginosus* (Graham, 1910)  
*centropunctatus* (Theobald, 1913)  
*culicinus* Edwards, 1922  
*cumminsii* (Theobald, 1903)  
*cumminsii mediopunctatus* (Theobald, 1909)  
*dalzieli* (Theobald, 1910)  
*davidi* Basio, 1971  
*dentatus* (Theobald, 1904)  
*domesticus* (Theobald, 1901)  
*durbanensis* (Theobald, 1903)  
*durbanensis angolae* Ribeiro & Ramos, 1974  
*ebogoensis* Rickenbach & Ferrara, 1965  
*eritreae* Lewis, 1942  
*fowleri* (de Charmoy, 1908)  
*gibbinsi* Edwards, 1935  
*gouldi* Reinert, 1972  
*grjebinei* Hamon, Taufflieb & Maillot, 1957  
*hirsutus* (Theobald, 1901)  
*hirsutus adenensis* Edwards, 1941  
*holocinctus* Edwards, 1941  
*jamesi* (Edwards, 1914)  
*karooensis* Muspratt, 1961  
*leesoni* Edwards, 1932  
*leptolabis* Edwards, 1936  
*leucarthritis* (Speiser, 1909)  
*longiseta* Edwards, 1936  
*lowisii* (Theobald, 1910)  
*mansouri* Qutubuddin, 1959  
*masoalensis* Fontenille & Brunhes, 1985  
*mathioti* Fontenille & Brunhes, 1985  
*mattinglyi* Hamon & Rickenbach, 1954  
*mediolineatus* (Theobald, 1901)  
*natronius* Edwards, 1932  
*nigricephalus* (Theobald, 1901)  
*nigrostriatus* (Barraud, 1927)  
*oakleyi* Stone, 1939  
*ochraceus* (Theobald, 1901)  
*orbitae* Edwards, 1922  
*ovazzai* Hamon & Adam, 1959  
*pachyurus* Edwards, 1936  
*pallidostriatus* (Theobald, 1907)  
*pampangensis* (Ludlow, 1905)

*pipersalatus* (Giles, 1902)  
*pubescens* Edwards, 1925  
*punctifemoris* (Ludlow, 1921)  
*quasiunivittatus* (Theobald, 1901)  
*rickenbachi* Hamon & Adam, 1959  
*semlikiensis* van Someren, 1950  
*senyavinensis* Knight & Hurlbut, 1949  
*stenoetrus* (Theobald, 1907)  
*stenoscutus* (Edwards, 1912)  
*subdentatus* Edwards, 1936  
*syntheticus* Barraud, 1928  
*taeniorhynchoides* (Christophers, 1911)  
*tauffliebi* Rickenbach & Ferrara, 1965  
*tricholabis* Edwards, 1941  
*tricholabis bwamba* (van Someren, 1950)  
*trimaculatus* (Theobald, 1905)  
*trukensis* Bohart, 1957  
*vexans* (Meigen, 1830)  
*vexans arabiensis* (Patton, 1905)  
*vexans nipponii* (Theobald, 1907)  
*vexans nocturnus* (Theobald, 1903)  
*wigglesworthi* Edwards, 1941

Subgenus *Alanstonea* Mattingly, 1960

*brevitibia* (Edwards, 1914)  
*treubi* (de Meijere, 1910)

Subgenus *Albuginosus* Reinert, 1987

*capensis* Edwards, 1924  
*gilliesi* van Someren, 1962  
*haworthi* Edwards, 1923  
*kapretwae* Edwards, 1941  
*kennethi* Muspratt, 1956  
*marshallii* (Theobald, 1901)  
*ngong* van Someren, 1950  
*stokesi* Evans, 1929  
*teesdalei* van Someren, 1954

Subgenus *Ayurakitia* Thurman, 1954

*griffithi* (Thurman, 1954)  
*peytoni* Reinert, 1972

Subgenus *Aztecaedes* Zavortink, 1972

*ramirezi* Vargas & Downs, 1950

Subgenus *Belkinus* Reinert, 1982

*aurotaeniatus* Edwards, 1922

Subgenus *Bifidistylus* Reinert, Harbach & Kitching, 2009

*boneti* Gil Collado, 1936

*boneti kumbae* Chwatt, 1948

*lamborni* Edwards, 1923

Subgenus *Borichinda* Harbach & Rattanarithikul, 2007

*cavernicolus* (Rattanarithikul & Harbach, 2007)

Subgenus *Bothaella* Reinert, 1973

*alongi* Galliard & Ngu, 1947

*brownsutumus* Dong, Zhu & Dong, 1999

*eldridgei* Reinert, 1973

*helenae* Reinert, 1973

*kleini* Reinert, 1973

*manhi* (Harbach & Cook, 2010)

Subgenus *Bruceharrisonius* Reinert, 2003

*alektorovi* Stackelberg, 1943

*aureostriatus* (Doleschall, 1857)

*christophersi* Edwards, 1922

*doonii* Wattal, Bhatia & Kalra, 1958

*greenii* (Theobald, 1903)

*hurlbuti* Lien, 1967

*okinawanus* Bohart, 1946

*taiwanus* Lien, 1968

Subgenus *Canraedes* Edwards, 1929

*cancricomes* Edwards, 1922

*curtipes* Edwards, 1915

*indonesiae* Mattingly, 1958

*kohkutensis* Mattingly, 1958  
*mamoedjoensis* Mattingly, 1958  
*masculus* Mattingly, 1958  
*palawanicus* Mattingly, 1958  
*penghuensis* Lien, 1968  
*simplex* (Theobald, 1903)  
*thurmanae* Mattingly, 1958

Subgenus *Catageiomyia* Theobald, 1903

*adami* Geoffroy, 1971  
*argenteopunctatus* (Theobald, 1901)  
*bedfordi* Edwards, 1936  
*chamboni* Cornet, 1968  
*dialloi* Hamon & Brengues, 1965  
*falabreguesi* Hamon, 1957  
*filicis* Ingram & de Meillon, 1927  
*grenieri* Hamon, Service, Adam & Taufflieb, 1961  
*hopkinsi* Edwards, 1936  
*insolens* Edwards, 1936  
*irritans* (Theobald, 1901)  
*lokojoensis* Service, 1959  
*lottei* Hamon & Brengues, 1965  
*microstictus* Edwards, 1936  
*minutus* (Theobald, 1901)  
*mixtus* Edwards, 1936  
*mutilus* Edwards, 1936  
*nyounae* Hamon & Adam, 1959  
*phyllolabis* Edwards, 1929  
*pseudotarsalis* van Someren, 1946  
*punctothoracis* (Theobald, 1909)  
*reali* Hamon & Adam, 1959  
*smithburni* van Someren, 1950  
*tarsalis* (Newstead, 1907)  
*veeniae* McIntosh, 1975  
*wendyae* Service, 1959  
*yangambiensis* de Meillon & Lavoipierre, 1944  
*yvonneae* Edwards, 1941

Subgenus *Catatassomyia* Dyar & Shannon, 1925

*meronephada* (Dyar & Shannon, 1925)

Subgenus *Christophersiomyia* Barraud, 1923

*annulirostris* (Theobald, 1905)  
*chionodes* Belkin, 1962  
*gombakensis* Mattingly, 1959  
*ibis* Barraud, 1931  
*thomsoni* (Theobald, 1905)

Subgenus *Coetzeemyia* Huang, Mathis & Wilkerson

*fryeri* (Theobald, 1912)

Subgenus *Collessius* Reinert, Harbach & Kitching, 2006

*banksi* Edwards, 1922  
*elsiae* (Barraud, 1923)  
*elsiae vicarius* Lien, 1968  
*hatorii* Yamada, 1921  
*macdougalli* Edwards, 1922  
*macfarlanei* (Edwards, 1914)  
*ningheensis* Lei, 1989  
*pseudotaeniatus* (Giles, 1901)  
*shortti* (Barraud, 1923)  
*tonkinensis* Galliard & Ngu, 1947

Subgenus *Cornetius* Huang, 2005

*cozi* Cornet, 1973

Subgenus *Dahliana* Reinert, Harbach & Kitching, 2006

*echinus* (Edwards, 1920)  
*geniculatus* (Olivier, 1791)  
*gilcolladoi* (Sánchez-Covisa Villa, Rodríguez Rodríguez & Guillén Llera, 1985)

Subgenus *Danielsia* Theobald, 1904

*albotaeniatus* (Leicester, 1904)  
*harperi* Knight, 1948  
*lepchanus* (Barraud, 1923)

Subgenus *Dendroskusea* Edwards, 1929

*kanarensis* Edwards, 1934  
*micropterus* (Giles, 1901)

*periskelatus* (Giles, 1902)  
*ramachandrai* Reuben, 1967  
*reginae* Edwards, 1922

Subgenus *Diceromyia* Theobald, 1911

*adersi* (Edwards, 1917)  
*bananea* Wolfs, 1958  
*cordellieri* Huang, 1986  
*coulangesi* Rodhain & Boutonnier, 1983  
*fascipalpis* (Edwards, 1912)  
*flavicollis* Edwards, 1928  
*furcifer* (Edwards, 1913)  
*grassei* Doucet, 1951  
*madagascarensis* van Someren, 1949  
*mefouensis* Ferrara, 1974  
*sylvaticus* Brunhes, 1983  
*taylori* Edwards, 1936  
*tiptoni* Grjebine, 1953  
*zethus de Meillon & Lavoipierre, 1944*

Subgenus *Dobrotworskyius* Reinert, Harbach & Kitching, 2006

*alboannulatus* (Macquart, 1850)  
*milsoni* (Taylor, 1915)  
*occidentalis* (Skuse, 1889)  
*rubrithorax* (Macquart, 1850)  
*rupestris* Dobrotworsky, 1959  
*subbasalis* Dobrotworsky, 1962  
*tubbutiensis* Dobrotworsky, 1959

Subgenus *Downsiomyia* Vargas, 1950

*albolateralis* (Theobald, 1908)  
*alboniveus* Barraud, 1934  
*axitiosus* Kulasekera, Knight & Harbach, 1990  
*dorseyi* Knight, 1946  
*ganapathi* Colless, 1958  
*harinasutai* Knight, 1978  
*idjenensis* Brug, 1934  
*inermis* Colless, 1958  
*lacteus* Knight, 1946  
*laoagensis* Knight, 1946  
*leonis* Colless, 1958

*litoreus* Colless, 1958  
*mikrokopion* Knight & Harrison, 1988  
*mjobergi* (Edwards, 1926)  
*mohani* Knight, 1969  
*nipponicus* LaCasse & Yamaguti, 1948  
*nippononiveus* Sasa & Nakahashi, 1952  
*nishikawai* Tanaka, Mizusawa & Saugstad, 1979  
*niveoides* Barraud, 1934  
*niveus* (Ludlow, 1903)  
*novoniveus* Barraud, 1934  
*omorii* Lien, 1968  
*pexus* Colless, 1958  
*pseudoniveus* (Theobald, 1905)  
*saperoi* Knight, 1946  
*shehzadae* Qutubuddin, 1972  
*sinensis* Chow, 1950  
*subniveus* Edwards, 1922  
*vanus* Colless, 1958  
*watteni* Lien, 1968

Subgenus *Edwardsaedes* Belkin, 1962

*bekkui* Mogi, 1977  
*imprimens* (Walker, 1861)  
*pingpaensis* Chang, 1965

Subgenus *Elpeytonius* Reinert, Harbach & Kitching, 2009

*apicoannulatus* (Edwards, 1912)  
*simulans* (Newstead & Carter, 1911)

Subgenus *Finlaya* Theobald, 1903

*alocasicola* Marks, 1947  
*ananae* Knight & Laffoon, 1946  
*avistylus* Brug, 1939  
*bougainvillensis* Marks, 1947  
*burnetti* Belkin, 1962  
*croceus* Knight & Laffoon, 1946  
*dobrotworskyi* Marks, 1958  
*fijiensis* Marks, 1947  
*flavipennis* Giles, 1904  
*franclemonti* Belkin, 1962  
*freycinetiae* Laird, 1957



*fuscipalpis* Belkin, 1962  
*fuscitarsis* Belkin, 1962  
*gahnicola* Marks, 1947  
*gani* Bonne-Wepster, 1940  
*gressitti* Bohart, 1957  
*hollingsheadi* Belkin, 1962  
*horotoi* Taylor, 1972  
*hui* Bohart, 1957  
*josephinae* Marks, 1958  
*knighti* Stone & Bohart, 1944  
*kochi* (Dönitz, 1901)  
*lewelleni* Starkey & Webb, 1946  
*luteus* (Ludlow, 1905)  
*maffii* Taylor & Tenorio, 1974  
*medleri* Knight & Laffoon, 1946  
*neogeorgianus* Belkin, 1962  
*oceanicus* Belkin, 1962  
*poicilius* (Theobald, 1903)  
*samoanus* (Grünberg, 1913)  
*schlosseri* Belkin, 1962  
*solomonis* Stone & Bohart, 1944  
*sorsogonensis* Bañez & Jueco, 1966  
*stonei* Knight & Laffoon, 1946  
*tutuila* Ramalingam & Belkin, 1965  
*wallacei* Edwards, 1926

Subgenus *Fredwardsius* Reinert, 2000

*vittatus* (Bigot, 1861)

Subgenus *Georgecraigius* Reinert, Harbach & Kitching, 2006

*atropalpus* (Coquillett, 1902)  
*epactius* Dyar & Knab, 1908  
*fluviatilis* (Lutz, 1904)

Subgenus *Geoskusea* Edwards, 1929

*baisasi* Knight & Hull, 1951  
*becki* Belkin, 1962  
*daggyi* Stone & Bohart, 1944  
*fimbripes* Edwards, 1924  
*kabaenensis* Brug, 1939  
*longiforceps* Edwards, 1929

*lunulatus* King & Hoogstraal, 1946  
*perryi* Belkin, 1962  
*timorensis* (Miyagi, Toma & Lien, 2004)  
*tonsus* Edwards, 1924

Subgenus *Gilesius* Reinert, Harbach & Kitching, 2006

*alius* Lien, 1968  
*pulchriventer* (Giles, 1901)

Subgenus *Gymnometopa* Coquillett, 1905

*mediovittatus* (Coquillett, 1906)

Subgenus *Halaedes* Belkin, 1962

*ashworthi* Edwards, 1921  
*australis* (Erichson, 1842)  
*wardangensis* Brust, Ballard, Driver, Hartley, Galway & Curran, 1998

Subgenus *Himalaius* Reinert, Harbach & Kitching, 2006

*gilli* (Barraud, 1924)  
*simlensis* Edwards, 1922

Subgenus *Hopkinsius* Reinert, Harbach & Kitching, 2008

*albocinctus* (Barraud, 1924)  
*barnardi* Edwards, 1924  
*embuensis* Edwards, 1930  
*ingrami* Edwards, 1930  
*nyasae* Edwards, 1930  
*seoulensis* Yamada, 1921  
*wellmanii* (Theobald, 1905)

Subgenus *Howardina* Theobald, 1903

*albonotatus* (Coquillett, 1906)  
*allotecnon* Kumm, Komp & Ruiz, 1940  
*arboREALIS* Bonne-Wepster & Bonne, 1920  
*argyrites* Dyar & Núñez Tovar, 1927  
*aureolineatus* Berlin, 1969  
*aurites* (Theobald, 1907)  
*aurivittatus* Cerqueira, 1943

*bahamensis* Berlin, 1969  
*brevis* Berlin, 1969  
*brevivittatus* Berlin, 1969  
*busckii* (Coquillett, 1906)  
*cozumelensis* Díaz Nájera, 1966  
*ecuadoriensis* Berlin, 1969  
*eleanorae* Berlin, 1969  
*fulvithorax* (Lutz, 1904)  
*grabhami* Berlin, 1969  
*guatemala* Berlin, 1969  
*guerrero* Berlin, 1969  
*inaequalis* (Grabham, 1907)  
*ioliota* Dyar & Knab, 1913  
*leei* Berlin, 1969  
*lorraineae* Berlin, 1969  
*marinkellei* Berlin, 1969  
*martinezi* Berlin, 1969  
*osornoi* Berlin, 1969  
*pseudodominicii* Komp, 1936  
*quadrivittatus* (Coquillett, 1902)  
*septemstriatus* Dyar & Knab, 1907  
*sexlineatus* (Theobald, 1901)  
*spinosus* Berlin, 1969  
*stenei* Thompson, 1956  
*vanemdeni* Martini, 1931  
*walkeri* (Theobald, 1901)  
*whitmorei* Dunn, 1918

Subgenus *Huaedes* Huang, 1968

*medialis* (Brug, 1932)  
*variepictus* (King & Hoogstraal, 1946)  
*wauensis* Huang, 1968

Subgenus *Hulecoeteomyia* Theobald, 1904

*chrysolineatus* (Theobald, 1907)  
*formosensis* Yamada, 1921  
*harveyi* (Barraud, 1923)  
*japonicus* (Theobald, 1901)  
*japonicus amamiensis* Tanaka, Mizusawa & Saugstad, 1979  
*japonicus shintienensis* Tsai & Lien, 1950  
*japonicus yaeyamensis* Tanaka, Mizusawa & Saugstad, 1979  
*jugraensis* (Leicester, 1908)

*koreicus* (Edwards, 1917)  
*nigrorhynchus* Brug, 1931  
*pallirostris* Edwards, 1922  
*reinerti* Rattanarithikul & Harrison, 1988  
*rizali* (Banks, 1906)  
*saxicola* Edwards, 1922  
*sherki* Knight, 1948  
*yunnanensis* (Gaschen, 1934)

Subgenus *Indusius* Edwards, 1934

*pulverulentus* Edwards, 1922

Subgenus *Isoaedes* Reinert, 1979

*cavaticus* Reinert, 1979

Subgenus *Jarnellius* Reinert, Harbach & Kitching, 2006

*deserticola* Zavortink, 1969  
*laguna* Arnell & Nielsen, 1972  
*monticola* Belkin & McDonald, 1957  
*sierrensis* (Ludlow, 1905)  
*varipalpus* (Coquillett, 1902)

Subgenus *Jihlienius* Reinert, Harbach & Kitching, 2006

*chungi* Lien, 1968  
*gonguoensis* Gong & Lu, 1986  
*unicinctus* Edwards, 1922

Subgenus *Kenknightia* Reinert, 1990

*dissimilierodes* Dong, Zhou & Dong, 2002  
*dissimilis* (Leicester, 1908)  
*gaffigani* Reinert, 1990  
*harbachi* Reinert, 1990  
*karwari* (Barraud, 1924)  
*lerozeboomi* Reinert, 1990  
*leucomeres* (Giles, 1904)  
*litwakae* Reinert, 1990  
*luzonensis* Rozeboom, 1946  
*paradissimilis* Rozeboom, 1946  
*pecori* Reinert, 1990

*wilkersoni* Reinert, 1990

Subgenus *Kompia* Aitken, 1941

*purpureipes* Aitken, 1941

Subgenus *Leptosomatomyia* Theobald, 1905

*aurimargo* Edwards, 1922

Subgenus *Levua* Stone & Bohart, 1944

*geoskusea* Amos, 1944

Subgenus *Lewnielsenius* Reinert, Harbach & Kitching, 2006

*muelleri* Dyar, 1920

Subgenus *Lorrainea* Belkin, 1962

*amesii* (Ludlow, 1903)

*celebicus* Mattingly, 1959

*dasyorrrhus* King & Hoogstraal, 1946

*fumidus* Edwards, 1928

*lamelliferus* Bohart & Ingram, 1946

Subgenus *Luius* Reinert, Harbach & Kitching, 2008

*fengi* Edwards, 1935

Subgenus *Macleaya* Theobald, 1903

*calabyi* Marks, 1963

*elchoensis* Taylor, 1929

*humeralis* Edwards, 1922

*littlechildi* Taylor, 1933

*macmillani* Marks, 1964

*molojiensis* Taylor, 1929

*spinosipes* Edwards, 1922

*stoneorum* Marks, 1977

*tremulus* (Theobald, 1903)

*tulliae* (Taylor, 1929)

*wattensis* Taylor, 1929

Subgenus *Molpemyia* Theobald, 1910

*auridorsum* Edwards, 1922  
*pecuniosus* Edwards, 1922  
*purpureus* (Theobald, 1910)

Subgenus *Mucidus* Theobald, 1901

*alternans* (Westwood, 1835)  
*aurantius* (Theobald, 1907)  
*aurantius chrysogaster* (Taylor, 1927)  
*ferinus* Knight, 1947  
*grahamii* (Theobald, 1909)  
*laniger* (Wiedemann, 1820)  
*lucianus* Muspratt, 1959  
*mucidus* (Karsch, 1887)  
*nigerrimus* (Theobald, 1913)  
*nigrescens* (Edwards, 1929)  
*quadripunctis* (Ludlow, 1910)  
*quasiferinus* Mattingly, 1961  
*scatophagoides* (Theobald, 1901)  
*sudanensis* (Theobald, 1908)  
*tonkingi* Gebert, 1948

Subgenus *Neomelaniconion* Newstead, 1907

*albicosta* (Edwards, 1913)  
*albiradius* (le Goff, Boussès & Brunhes, 2007)  
*albothorax* (Theobald, 1907)  
*aurovenatus* Worth, 1960  
*belleci* (le Goff, Boussès & Brunhes, 2007)  
*bequaerti* Wolfs, 1947  
*bergerardi* Pajot & Geoffroy, 1971  
*bolense* Edwards, 1936  
*carteri* Edwards, 1936  
*circumluteolum* (Theobald, 1908)  
*crassiforceps* Edwards, 1927  
*ellinorae* Edwards, 1941  
*flavimargo* Edwards, 1941  
*fontenillei* (le Goff, Boussès & Brunhes, 2007)  
*fuscinervis* (Edwards, 1914)  
*jamoti* Hamon & Rickenbach, 1954  
*lineatopennis* (Ludlow, 1905)  
*lineatopennis aureum* (Gutsevich, 1955)

*luridus* McIntosh, 1971  
*luteolateralis* (Theobald, 1901)  
*mcintoshi* Huang, 1985  
*monotrichus* Edwards, 1936  
*nigropterum* (le Goff, Boussès & Brunhes, 2007)  
*palpale* Newstead, 1907  
*pogonurus* Edwards, 1936  
*punctocostalis* (Theobald, 1909)  
*sylvaticum* (le Goff, Boussès & Brunhes, 2007)  
*taeniarostris* (Theobald, 1909)  
*unidentatum* McIntosh, 1971

Subgenus *Nyctomyia* Harbach, 2013

*pholeocolus* (Linton & Harbach, 2013)  
*biunguiculatus* (Harbach, 2014)

Subgenus *Ochlerotatus* Lynch Arribalzaga, 1891

*aboriginis* Dyar, 1917  
*abserratus* (Felt & Young, 1904)  
*aculeatus* (Theobald, 1903)  
*aenigmaticus* Cerqueira & Costa, 1946  
*akkeshiensis* Tanaka, 1998  
*albescens* Edwards, 1921  
*albifasciatus* (Macquart, 1838)  
*albineus* Séguy, 1923  
*aloponotum* Dyar, 1917  
*ambreensis* Rodhain & Boutonnier, 1983  
*andersoni* Edwards, 1926  
*angustivittatus* Dyar & Knab, 1907  
*annulipes* (Meigen, 1830)  
*antipodeus* (Edwards, 1920)  
*atactavittatus* Arnell, 1976  
*atlanticus* Dyar & Knab, 1906  
*auratus* Grabham, 1906  
*aurifer* (Coquillett, 1903)  
*bancroftianus* Edwards, 1921  
*behningi* Martini, 1926  
*bejaranoi* Martinez, Carcavallo & Prosen, 1960  
*berlandi* Séguy, 1921  
*bicristatus* Thurman & Winkler, 1950  
*bimaculatus* (Coquillett, 1902)  
*biskraensis* Brunhes, 1999

*bogotanus* (Arnell, 1976)  
*breedensis* Muspratt, 1953  
*burjaticus* (Kuchartshuk, 1973)  
*burpengaryensis* (Theobald, 1905)  
*caballus* (Theobald, 1912)  
*cacozelus* Marks, 1963  
*calcariae* Marks, 1957  
*calumnior* Belkin, Heinemann & Page, 1970  
*campestris* Dyar & Knab, 1907  
*camptorhynchus* (Thomson, 1869)  
*canadensis* (Theobald, 1901)  
*canadensis mathesoni* Middlekauff  
*cantans* (Meigen, 1818)  
*cantator* (Coquillett, 1903)  
*caspicus* (Pallas, 1771)  
*caspicus hargreavesi* Edwards, 1920  
*caspicus meirae* Ribeiro, Ramos, Capela & Pires, 1980  
*cataphylla* Dyar, 1916  
*chelli* (Edwards, 1915)  
*churchillensis* Ellis & Brust, 1973  
*clelandi* (Taylor, 1914)  
*clivis* Lanzaro & Eldridge, 1992  
*coluzzii* Rioux, Guilvard & Pasteur, 1998  
*comitatus* Arnell, 1976  
*communis* (de Geer, 1776)  
*condolenscens* Dyar & Knab, 1907  
*continentalis* Dobrotworsky, 1960  
*crinifer* (Theobald, 1903)  
*culiciformis* (Theobald, 1905)  
*cunabulanus* Edwards, 1924  
*cyprionides* Danilov & Stupin, 1982  
*cyprion* Ludlow, 1920  
*dahlae* (Nielsen, 2009)  
*decticus* Howard, Dyar & Knab, 1917  
*deficiens* Arnell, 1976  
*detritus* Haliday, 1833  
*diantaeus* Howard, Dyar & Knab, 1913  
*dorsalis* (Meigen, 1830)  
*dufourii* Hamon, 1953  
*duplex* Martini, 1926  
*dupreei* (Coquillett, 1904)  
*dzeta* Séguy, 1924  
*edgari* Stone & Rosen, 1952  
*eidsvoldensis* Mackerras, 1927



*eucephalaeus* Dyar, 1918  
*euedes* Howard, Dyar & Knab, 1913  
*euiris* Dyar, 1922  
*euplocamus* Dyar & Knab, 1906  
*excrucians* (Walker, 1856)  
*explorator* Marks, 1964  
*fitchii* (Felt & Young, 1904)  
*flavescens* (Müller, 1764)  
*flavifrons* (Skuse, 1889)  
*fulvus* (Wiedemann, 1828)  
*fulvus pallens* Ross, 1943  
*grossbecki* Dyar & Knab, 1906  
*gutzevichi* Dubitsky & Deshevykh, 1978  
*hakusanensis* Yamaguti & Tamaboko, 1954  
*harrisoni* Muspratt, 1953  
*hastatus* Dyar, 1922  
*hesperonotius* Marks, 1959  
*hexodontus* Dyar, 1916  
*hodgkini* Marks, 1959  
*hokkaidensis* Tanaka, Mizusawa & Saugstad, 1979  
*hungaricus* Mihalyi, 1955  
*imperfectus* Dobrotworsky, 1962  
*impiger* (Walker, 1848)  
*impiger daisetsuzanus* Tanaka, Mizusawa & Saugstad, 1979  
*implicatus* Vockeroth, 1954  
*incomptus* Arnell, 1976  
*increpitus* Dyar, 1916  
*inexpectatus* Bonne-Wepster, 1948  
*infirmatus* Dyar & Knab, 1906  
*intermedius* Danilov & Gornostaeva, 1987  
*intrudens* Dyar, 1919  
*jacobinae* Serafim & Davis, 1933  
*jorgi* Carpintero & Leguizamón, 2000  
*juppi* McIntosh, 1973  
*kasachstanicus* Gutsevich, 1962  
*krymmontanus* Alekseev, 1989  
*lasaensis* Meng, 1962  
*lasaensis gyirongensis* Ma, 1982  
*lepidonotus* Edwards, 1920  
*lepidus* Cerqueira & Paraense, 1945  
*leucomelas* (Meigen, 1804)  
*linesi* Marks, 1964  
*longifilamentus* Su & Zhang, 1988  
*luteifemur* Edwards, 1926

*macintoshi* Marks, 1959  
*martineti* Senevet, 1937  
*mcdonaldi* Belkin, 1962  
*melanimon* Dyar, 1924  
*meprai* Martinez & Prosen, 1953  
*mercurator* Dyar, 1920  
*milleri* Dyar, 1922  
*mittchellae* (Dyar, 1905)  
*montchadskyi* Dubitsky, 1968  
*multiplex* (Theobald, 1903)  
*nevadensis* Chapman & Barr, 1964  
*nigrinus* (Eckstein, 1918)  
*nigripes* (Zetterstedt, 1838)  
*nigrithorax* (Macquart, 1847)  
*nigrocanus* Martini, 1927  
*nigromaculis* (Ludlow, 1906)  
*niphadopsis* Dyar & Knab, 1918  
*nivalis* Edwards, 1926  
*normanensis* (Taylor, 1915)  
*nubilus* Theobald, 1903  
*obturbator* Dyar & Knab, 1907  
*oligopistus* Dyar, 1918  
*patersoni* Shannon & del Ponte, 1928  
*pectinatus* Arnell, 1976  
*pennai* Antunes & Lane, 1938  
*perkinsi* Marks, 1949  
*pertinax* Grabham, 1906  
*phaecasiatus* Marks, 1964  
*phaeonotus* Arnell, 1976  
*ponips* Dyar, 1919  
*postspiraculosus* Dobrotworsky, 1961  
*procax* (Skuse, 1889)  
*provocans* (Walker, 1848)  
*pseudonormanensis* Marks, 1949  
*pulcritarsis* (Rondani, 1872)  
*pulcritarsis asiaticus* Edwards, 1926  
*pullatus* (Coquillett, 1904)  
*punctodes* Dyar, 1922  
*punctor* (Kirby, 1837)  
*purpuraceus* Brug, 1932  
*purpureifemur* Marks, 1959  
*purpuriventris* Edwards, 1926  
*quasirusticus* Torres Cañameres, 1951  
*ratcliffei* Marks, 1959

*raymondi* del Ponte, Castro & García, 1951  
*refiki* Medschid, 1928  
*rempeli* Vockeroth, 1954  
*rhyacophilus* da Costa Lima, 1933  
*riparioides* Su & Zhang, 1987  
*riparius* Dyar & Knab, 1907  
*rusticus* (Rossi, 1790)  
*rusticus subtrichurus* Martini, 1927  
*rusticus trichurus* (Dyar, 1904)  
*sagax* (Skuse, 1889)  
*sapiens* Marks, 1964  
*scapularis* (Rondani, 1848)  
*schizopinax* Dyar, 1929  
*schtakelbergi* Shingarev, 1928  
*scutellalbum* Boshell-Manrique, 1939  
*sedaensis* Lei, 1989  
*sergievi* Danilov, Markovich & Proskuryakova, 1978  
*serratus* (Theobald, 1901)  
*shannoni* Vargas & Downs, 1950  
*silvestris* (Dobrotworsky, 1961)  
*simanini* Gutsevich, 1966  
*sinkiangensis* Hsiao, 1977  
*sollicitans* (Walker, 1856)  
*spencerii* (Theobald, 1901)  
*spencerii idahoensis* (Theobald, 1903)  
*spilotus* Marks, 1963  
*squamiger* (Coquillett, 1902)  
*sticticus* (Meigen, 1838)  
*stigmaticus* Edwards, 1922  
*stimulans* (Walker, 1848)  
*stramineus* Dubitzky, 1970  
*stricklandi* (Edwards, 1912)  
*subalbirostris* Klein & Marks, 1960  
*subdiversus* Martini, 1926  
*surcoufi* (Theobald, 1912)  
*synchytus* Arnell, 1976  
*taeniorhynchus* (Wiedemann, 1821)  
*tahoensis* Dyar, 1916  
*thelcter* Dyar, 1918  
*theobaldi* (Taylor, 1914)  
*thibaulti* Dyar & Knab, 1910  
*tormentor* Dyar & Knab, 1906  
*tortilis* (Theobald, 1903)  
*trivittatus* (Coquillett, 1902)

*turneri* Marks, 1963  
*upatensis* Anduze & Hecht, 1943  
*ventrovittis* Dyar, 1916  
*vigilax* (Skuse, 1889)  
*vigilax ludlowae* (R. Blanchard)  
*vigilax vansomeranae* Mattingly  
*vittiger* (Skuse, 1889)  
*washinoi* Lanzaro & Eldridge, 1992

Subgenus *Paraedes* Edwards, 1934

*barraudi* (Edwards, 1934)  
*bonneae* Mattingly, 1958  
*chrysoscuta* (Theobald, 1910)  
*collessi* Mattingly, 1958  
*menoni* Mattingly, 1958  
*ostentatio* (Leicester, 1908)  
*pagei* (Ludlow, 1911)  
*thailandensis* Reinert, 1976

Subgenus *Patmarksia* Reinert, Harbach & Kitching, 2006

*anggiensis* Bonne-Wepster, 1937  
*argenteitarsis* Brug, 1932  
*argyronotum* Belkin, 1962  
*buxtoni* Belkin, 1962  
*clintoni* Taylor, 1946  
*derooki* Brug, 1932  
*dobodurus* King & Hoogstraal, 1946  
*hollandius* King & Hoogstraal, 1946  
*mackerrasi* Taylor, 1927  
*novalbitarsis* King & Hoogstraal, 1946  
*palmarum* Edwards, 1924  
*papuensis* (Taylor, 1914)  
*subalbitarsis* King & Hoogstraal, 1946

Subgenus *Petermattinglyius* Reinert, Harbach & Kitching, 2009

*franciscoi* Mattingly, 1959  
*iyengari* Edwards, 1923  
*punctipes* Edwards, 1921  
*scanloni* Reinert, 1970  
*whartoni* Mattingly, 1965

Subgenus *Phagomyia* Theobald, 1905

*assamensis* (Theobald, 1908)  
*cacharanus* (Barraud, 1923)  
*cogilli* Edwards, 1922  
*deccanus* (Barraud, 1923)  
*feegradei* Barraud, 1934  
*gubernatoris* (Giles, 1901)  
*gubernatoris kotiensis* Barraud, 1934  
*inquinatus* Edwards, 1922  
*iwi* Marks, 1955  
*khazani* Edwards, 1922  
*kiangsiensis* Tung, 1955  
*lophoventralis* (Theobald, 1910)  
*melanopterus* (Giles, 1904)  
*plumiferus* King & Hoogstraal, 1946  
*prominens* (Barraud, 1923)  
*stevensoni* (Barraud, 1923)  
*watasei* Yamada, 1921

Subgenus *Polyleptiomyia* Theobald, 1905

*albocephalus* (Theobald, 1903)  
*gandarai* da Cunha Ramos, Capela & Ribeiro, 1995

Subgenus *Pseudoarmigeres* Stone & Knight, 1956

*albomarginatus* (Newstead, 1907)  
*argenteoventralis* (Theobald, 1909)  
*argenteoventralis dunni* (Evans, 1928)  
*kummi* Edwards, 1930  
*michaelikati* van Someren, 1946  
*michaelikati gurneri* van Someren, 1946  
*natalensis* Edwards, 1930

Subgenus *Rampamyia* Reinert, Harbach & Kitching, 2006

*albilabris* Edwards, 1925  
*notoscriptus* (Skuse, 1889)  
*notoscriptus montanus* Brug, 1939  
*quinquelineatus* Edwards, 1922

Subgenus *Rhinoskusea* Edwards, 1929

*longirostris* (Leicester, 1908)  
*pillaii* Mattingly, 1958  
*portonovoensis* Tewari & Hiriyan, 1992  
*wardi* Reinert, 1976

Subgenus *Sallumia* Reinert, Harbach & Kitching, 2008

*hortator* Dyar & Knab, 1907  
*perventor* Cerqueira & Costa, 1946

Subgenus *Scutomyia* Theobald, 1904

*albolineatus* (Theobald, 1904)  
*arboricola* Knight & Rozeboom, 1946  
*bambusicola* Knight & Rozeboom, 1946  
*boharti* Knight & Rozeboom, 1946  
*hoogstraali* Knight & Rozeboom, 1946  
*impatibilis* (Walker, 1860)  
*laffooni* Knight & Rozeboom, 1946  
*platylepidus* Knight & Hull, 1951  
*pseudalbolineatus* Brug, 1939

Subgenus *Skusea* Theobald, 1903

*cartroni* (Ventrillon, 1906)  
*lambrechti* van Someren, 1971  
*moucheti* Ravaonjanahary & Brunhes, 1977  
*pembaensis* Theobald, 1901

Subgenus *Stegomyia* Theobald, 1901

*aegypti* (Linnaeus, 1762)  
*aegypti formosus* (Walker, 1848)  
*africanus* (Theobald, 1901)  
*agrihanensis* Bohart, 1957  
*albopictus* (Skuse, 1895)  
*alcasidi* Huang, 1972  
*alorensis* Bonne-Wepster & Brug, 1932  
*amaltheus* de Meillon & Lavoipierre, 1944  
*andrewsi* Edwards, 1926  
*angustus* Edwards, 1935  
*annandalei* (Theobald, 1910)  
*aobae* Belkin, 1962  
*apicoargenteus* (Theobald, 1909)

*bambusae* Edwards, 1935  
*blacklocki* Evans, 1925  
*bromeliae* (Theobald, 1911)  
*burnsi* Basio & Reisen, 1971  
*calceatus* Edwards, 1924  
*chaussieri* Edwards, 1923  
*chemulpoensis* Yamada, 1921  
*contiguus* Edwards, 1936  
*cooki* Belkin, 1962  
*corneti* Huang, 1986  
*craggi* (Barraud, 1923)  
*cretinus* Edwards, 1921  
*daitensis* Miyagi & Toma, 1981  
*deboeri* Edwards, 1926  
*demeilloni* Edwards, 1936  
*denderensis* Wolfs, 1949  
*dendrophilus* Edwards, 1921  
*desmotes* (Giles, 1904)  
*dybasi* Bohart, 1957  
*ealaensis* Huang, 2004  
*edwardsi* (Barraud, 1923)  
*ethiopiensis* Huang, 2004  
*flavopictus* Yamada, 1921  
*flavopictus downsi* Bohart & Ingram, 1946  
*flavopictus miyarai* Tanaka, Mizusawa & Saugstad, 1979  
*fraseri* (Edwards, 1912)  
*futunae* Belkin, 1962  
*galloisi* Yamada, 1921  
*galloisiodes* Liu & Lu, 1984  
*gandaensis* Huang, 2004  
*gardnerii* (Ludlow, 1905)  
*gardnerii imitator* (Leicester, 1908)  
*grantii* (Theobald, 1901)  
*guamensis* Farner & Bohart, 1944  
*gurneyi* Stone & Bohart, 1944  
*hakanssoni* Knight & Hurlbut, 1949  
*hansfordi* Huang, 1997  
*hebrideus* Edwards, 1926  
*heischi* van Someren, 1951  
*hensilli* Farner, 1945  
*hogsbackensis* Huang, 2004  
*hoguei* Belkin, 1962  
*horrescens* Edwards, 1935  
*josiahae* Huang, 1988

*katherinensis* Woodhill, 1949  
*keniensis* van Someren, 1946  
*kenyae* van Someren, 1946  
*kesseli* Huang & Hitchcock, 1980  
*kivuensis* Edwards, 1941  
*krombeini* Huang, 1975  
*langata* van Someren, 1946  
*ledgeri* Huang, 1981  
*lilii* (Theobald, 1910)  
*luteocephalus* (Newstead, 1907)  
*maehleri* Bohart, 1957  
*malayensis* Colless, 1962  
*malikuli* Huang, 1973  
*marshallensis* Stone & Bohart, 1944  
*mascarensis* MacGregor, 1924  
*masseyi* Edwards, 1923  
*mattinglyorum* Huang, 1994  
*maxgermaini* Huang, 1990  
*mediopunctatus* (Theobald, 1905)  
*mediopunctatus sureilensis* Barraud, 1934  
*metallicus* (Edwards, 1912)  
*mickevichae* Huang, 1988  
*mpusiensis* Huang, 2004  
*muroaforcete* Huang, 1997  
*neoafricanus* Cornet, Valade & Dieng, 1978  
*neogalloisi* Chen & Chen, 2000  
*neopandani* Bohart, 1957  
*njombiensis* Huang, 1997  
*novalbopictus* Barraud, 1931  
*opok* Corbet & van Someren, 1962  
*palauensis* Bohart, 1957  
*pandani* Stone, 1939  
*patriciae* Mattingly, 1954  
*paullusi* Stone & Farner, 1945  
*pernotatus* Farner & Bohart, 1944  
*perplexus* (Leicester, 1908)  
*polynesiensis* Marks, 1951  
*poweri* (Theobald, 1905)  
*pseudalbopictus* (Borel, 1928)  
*pseudoafricanus* Chwatt, 1949  
*pseudonigeria* (Theobald, 1910)  
*pseudoscutellaris* (Theobald, 1910)  
*quasiscutellaris* Farner & Bohart, 1944  
*rhungkiangensis* Chang & Chang, 1974



*riversi* Bohart & Ingram, 1946  
*robinsoni* Belkin, 1962  
*rotanus* Bohart & Ingram, 1946  
*rotumae* Belkin, 1962  
*ruwenzori* Haddow & van Someren, 1950  
*saimedres* Huang, 1988  
*saipanensis* Stone, 1945  
*sampi* Huang, 2004  
*schwetzi* Edwards, 1926  
*scutellaris* (Walker, 1858)  
*scutoscriptus* Bohart & Ingram, 1946  
*seampi* Huang, 1974  
*seatoi* Huang, 1969  
*segermanae* Huang, 1997  
*sibiricus* Danilov & Filippova, 1978  
*simpsoni* (Theobald, 1905)  
*soleatus* Edwards, 1924  
*strelitziae* Muspratt, 1950  
*subalbopictus* Barraud, 1931  
*subargenteus* Edwards, 1925  
*tabu* Ramalingam & Belkin, 1965  
*tongae* Edwards, 1926  
*tulagiensis* Edwards, 1926  
*unilineatus* (Theobald, 1906)  
*upolensis* Marks, 1957  
*usambara* Mattingly, 1953  
*varuae* Belkin, 1962  
*vinsoni* Mattingly, 1953  
*w-albus* (Theobald, 1905)  
*wadai* Tanaka, Mizusawa & Saugstad, 1979  
*woodi* Edwards, 1922

Subgenus *Tanakaius* Reinert, Harbach & Kitching, 2004

*savoryi* Bohart, 1957  
*togoi* (Theobald, 1907)

Subgenus *Tewarius* Reinert, 2006

*agastyai* Tewari & Hiriyan, 1992  
*nummatus* Edwards, 1923  
*pseudonummatus* Reinert, 1973  
*reubena* Tewari & Hiriyan, 1992

Subgenus *Vansomerenis* Reinert, Harbach & Kitching, 2006

*luteostriatus* Robinson, 1950  
*pulchrithorax* Edwards, 1939  
*hancocki* van Someren, 1962

Subgenus *Zavortinkius* Reinert, 1999

*brunhesi* Reinert, 1999  
*brygooi* Brunhes, 1971  
*fulgens* (Edwards, 1917)  
*geoffroyi* Reinert, 1999  
*huangae* Reinert, 1999  
*interruptus* Reinert, 1999  
*longipalpis* (Grünberg, 1905)  
*monetus* Edwards, 1935  
*mzooi* van Someren, 1962  
*phillipi* van Someren, 1949  
*pollinator* (Graham, 1910)

Subgenus uncertain

*aitkeni* Schick, 1970  
*alboapicus* Schick, 1970  
*alticola* Bonne-Wepster, 1948  
*amabilis* Schick, 1970  
*argyrothorax* Bonne-Wepster & Bonne, 1920  
*auronitens* Edwards, 1922  
*australiensis* (Theobald, 1910)  
*berlini* Schick, 1970  
*bertrami* Schick, 1970  
*biocellatus* (Taylor, 1915)  
*braziliensis* Gordon & Evans, 1922  
*brelandi* Zavortink, 1972  
*britteni* Marks & Hodgkin, 1958  
*buenaventura* Schick, 1970  
*burgeri* Zavortink, 1972  
*campana* Schick, 1970  
*candidoscutellum* Marks, 1947  
*casali* Schick, 1970  
*chionotum* Zavortink, 1972  
*crossi* Lien, 1967  
*daliensis* (Taylor, 1916)  
*daryi* Schick, 1970

*diazi* Schick, 1970  
*eatoni* (Edwards, 1916)  
*gabriel* Schick, 1970  
*galindoi* Schick, 1970  
*gracilelineatus* Bonne-Wepster, 1937  
*hendersoni* Cockerell, 1918  
*heteropus* Dyar, 1921  
*homoeopus* Dyar, 1922  
*idanus* Schick, 1970  
*impostor* Schick, 1970  
*insolitus* (Coquillett, 1906)  
*keefei* King & Hoogstraal, 1946  
*knabi* (Coquillett, 1906)  
*komp* Vargas & Downs, 1950  
*koreicoides* Sasa, Kano & Hayashi, 1950  
*lauriei* (Carter, 1920)  
*mallochi* Taylor, 1944  
*metoecopus* Dyar, 1925  
*monocellatus* Marks, 1948  
*niveoscutum* Zavortink, 1972  
*oreophilus* (Edwards, 1916)  
*peipingensis* Feng, 1938  
*plagosus* Marks, 1959  
*podographicus* Dyar & Knab, 1906  
*quasirubithorax* (Theobald, 1910)  
*roai* Belkin, 1962  
*rubiginosus* Belkin, 1962  
*sandrae* Zavortink, 1972  
*schicki* Zavortink, 1972  
*schroederi* Schick, 1970  
*sintoni* (Barraud, 1924)  
*stanleyi* Peters, 1963  
*subauridorsum* Marks, 1948  
*suffusus* Edwards, 1922  
*sumidero* Schick, 1970  
*tehuantepec* Schick, 1970  
*terrens* (Walker, 1856)  
*thorntoni* Dyar & Knab, 1907  
*toxopeusi* Bonne-Wepster, 1948  
*triseriatus* (Say, 1823)  
*tsiliensis* King & Hoogstraal, 1946  
*vargasi* Schick, 1970  
*versicolor* (Barraud, 1924)  
*wasselli* Marks, 1947

*zavortinki* Schick, 1970  
*zoosophus* Dyar & Knab, 1918

Not placed by Sathe & Girhe, 2002

*kolhapuriensis* Sathe & Girhe, 2002  
*panchgangee* Sathe & Girhe, 2002  
*sangitee* Sathe & Girhe, 2002  
*sangiti* Girhe & Sathe, 2001

## Genus *Armigeres*

*Armigeres* Theobald, 1901

*alkatirii* Toma, Miyagi & Syafruddin, 1995  
*apoensis* Bohart & Farner, 1944  
*aureolineatus* (Leicester, 1908)  
*azurini* Basio, 1971  
*baisasi* Stone & Thurman, 1958  
*bhayungi* Thurman & Thurman, 1958  
*breinli* (Taylor, 1914)  
*candelabrifera* Brug, 1939  
*confusus* Edwards, 1915  
*conjungens* Edwards, 1914  
*denbesteni* Brug, 1925  
*durhami* (Edwards, 1917)  
*ejercitoi* Baisas, 1935  
*fimbriatus* Edwards, 1930  
*foliatus* Brug, 1931  
*giveni* Edwards, 1926  
*hybridus* Edwards, 1914  
*joloensis* (Ludlow, 1904)  
*jugraensis* (Leicester, 1908)  
*kesseli* Ramalingam, 1987  
*kinabaluensis* Ramalingam, 1972  
*kuchingensis* Edwards, 1915  
*lacuum* Edwards, 1922  
*laoensis* Toma & Miyagi, 2003  
*maiae* (Edwards, 1917)  
*malayi* (Theobald, 1901)  
*manalangi* Baisas, 1935  
*maximus* Edwards, 1922  
*milnensis* Lee, 1944  
*moultoni* Edwards, 1914

*obturbans* (Walker, 1859)  
*pallithorax* Dong, Zhou & Dong, 2004  
*papuensis* Peters, 1963  
*setifer* Delfinado, 1966  
*seticoxitus* Luh & Li, 1981  
*subalbatus* (Coquillett, 1898)  
*subalbatus chrysocorporis* Hsieh & Liao, 1956  
*theobaldi* Barraud, 1934  
*yunnanensis* Dong, Zhou & Dong, 1995

*Leicesteria* Theobald, 1904

*annulipalpis* (Theobald, 1910)  
*annulitarsis* (Leicester, 1908)  
*balteatus* Macdonald, 1960  
*cingulatus* (Leicester, 1908)  
*dentatus* Barraud, 1927  
*digitatus* (Edwards, 1914)  
*dolichocephalus* (Leicester, 1908)  
*flavus* (Leicester, 1908)  
*inchoatus* Barraud, 1927  
*lepidocoxitus* Dong, Zhou & Dong, 1995  
*longipalpis* (Leicester, 1904)  
*magnus* (Theobald, 1908)  
*menglaensis* Dong, Zhou & Dong, 2002  
*omissus* (Edwards, 1914)  
*pectinatus* (Edwards, 1914)  
*pendulus* (Edwards, 1914)  
*traubi* Macdonald, 1960  
*vimoli* Thurman & Thurman, 1958

**Genus Eretmapodites**

*adami* Ferrara & Eouzan, 1974  
*angolensis* da Cunha Ramos & Ribeiro, 1992  
*argyrurus* Edwards, 1936  
*breguesi* Rickenbach & Lombrici, 1975  
*brottesi* Rickenbach, 1967  
*caillardi* Rickenbach, Ferrara & Eouzan, 1968  
*chrysogaster* Graham, 1909  
*corbeti* Hamon, 1962  
*dracaenae* Edwards, 1916  
*dundo* da Cunha Ramos & Ribeiro, 1992  
*eouzani* Rickenbach & Lombrici, 1974

*ferrarai* Rickenbach & Eouzan, 1970  
*forcipulatus* Edwards, 1936  
*germaini* Rickenbach & Eouzan, 1970  
*gilletti* van Someren, 1949  
*grahami* Edwards, 1911  
*grenieri* Hamon & van Someren, 1961  
*haddowi* van Someren, 1949  
*hamoni* Grjebine, 1972  
*harperi* van Someren, 1949  
*hightoni* van Someren, 1947  
*inornatus* Newstead, 1907  
*intermedius* Edwards, 1936  
*jani* Rickenbach & Lombri, 1976  
*lacani* Rickenbach & Eouzan, 1970  
*leucopous* Graham, 1909  
*mahaffyi* van Someren, 1949  
*marcellei* Adam & Hamon, 1959  
*mattinglyi* Hamon & van Someren, 1961  
*melanopous* Graham, 1909  
*mortiauxi* Cunha Ramos & Ribeiro, 1990  
*oedipodeios* Graham, 1909  
*parvipluma* Edwards, 1941  
*pauliani* Grjebine, 1950  
*penicillatus* Edwards, 1941  
*plioleucus* Edwards, 1941  
*plioleucus brevis* Edwards, 1941  
*productus* Edwards, 1941  
*quinquevittatus* Theobald, 1901†  
*ravissei* Rickenbach & Eouzan, 1970  
*rickenbachi* Ferrara & Eouzan, 1974  
*salauni* Rickenbach, Ferrara & Eouzan, 1968  
*semisimplicipes* Edwards, 1914  
*silvestris* Ingram & de Meillon, 1927  
*silvestris conchobius* Edwards, 1941  
*subsimplicipes* Edwards, 1914  
*tendeiroi* da Cunha Ramos, Ribeiro & Machado, 1992  
*tonsus* Edwards, 1941  
*vansomereni* Hamon, 1962  
*wasoni* Edwards, 1941  
*wasoni douceti* Adam & Hamon, 1959

## **Genus *Haemagogus***

Subgenus *Conopostegus* Dyar, 1925

*clarki* (Galindo, Carpenter & Trapido, 1953)  
*leucocelaenus* (Dyar & Shannon, 1924)  
*leucophoebus* (Galindo, Carpenter & Trapido, 1953)  
*leucotaeniatus* (Komp, 1938)

Subgenus *Haemagogus* Williston, 1896

*acutisentis* Arnell, 1973  
*aeritinctus* Galindo & Trapido, 1967  
*albomaculatus* Theobald, 1903  
*anastasionis* Dyar, 1921  
*andinus* Osorno-Mesa, 1944  
*argyromeris* Dyar & Ludlow, 1921  
*baresi* Cerqueira, 1960  
*boshelli* Osorno-Mesa, 1944  
*capricornii* Lutz, 1904  
*celeste* Dyar & Nuñez Tovar, 1927  
*chalcospilans* Dyar, 1921  
*chrysochlorus* Arnell, 1973  
*equinus* Theobald, 1903  
*iridicolor* Dyar, 1921  
*janthinomys* Dyar, 1921  
*lucifer* (Howard, Dyar & Knab, 1913)  
*mesodentatus* Komp & Kumm, 1938  
*nebulosus* Arnell, 1973  
*panarchys* Dyar, 1921  
*regalis* Dyar & Knab, 1906  
*soperi* Levi-Castillo, 1955  
*spgazzinii* Brethès, 1912  
*splendens* Williston, 1896  
*tropicalis* Cerqueira & Antunes, 1938

### **Genus *Heizmannia***

Subgenus *Heizmannia* Ludlow, 1905

*aurea* Brug, 1932  
*aureochaeta* (Leicester, 1908)  
*carteri* Amerasinghe, 1993  
*chandi* Edwards, 1922  
*chengi* Lien, 1968  
*communis* (Leicester, 1908)  
*complex* (Theobald, 1910)

*covelli* Barraud, 1929  
*demeilloni* Mattingly, 1970  
*funerea* (Leicester, 1908)  
*greenii* (Theobald, 1905)  
*heterospina* Gong & Lu, 1986  
*himalayensis* Edwards, 1922  
*indica* (Theobald, 1905)  
*kana* Tanaka, Mizusawa & Saugstad, 1979  
*kanhsienensis* Tung, 1955  
*lii* Wu, 1936  
*macdonaldi* Mattingly, 1957  
*mattinglyi* Thurman, 1959  
*menglianensis* Lu & Gong, 1986  
*menglianeroides* Dong, Dong & Zhou, 2003  
*persimilis* Mattingly, 1970  
*propinqua* Mattingly, 1970  
*proxima* Mattingly, 1970  
*reidi* Mattingly, 1957  
*ruiliensis* Dong, Zhou & Wang, 1997  
*scanloni* Mattingly, 1970  
*scintillans* Ludlow, 1905  
*taiwanensis* Lien, 1968  
*tengchongensis* Dong, Wang & Zhou, 2002  
*thelmae* Mattingly, 1970  
*viridis* Barraud, 1929

Subgenus *Mattinglyia* Lien, 1968

*achaetae* (Leicester, 1908)  
*catesi* (Lien, 1968)  
*discrepans* (Edwards, 1922)  
*lui* Gong & Li, 1999  
*occidentayunnana* (Gong & Lu, 1991)  
*tripunctata* (Theobald, 1908)

### **Genus *Opifex***

Subgenus *Nothoskusea* Dumbleton, 1962  
*chathamicus* (Dubleton, 1962)

Subgenus *Opifex* Hutton, 1902  
*fuscus* Hutton, 1902

### **Genus *Psorophora***



Subgenus *Grabhamia* Theobald, 1903

*cingulata* (Fabricius, 1805)  
*columbiae* (Dyar & Knab, 1906)  
*confinnis* (Lynch Arribáizaga, 1891)  
*dimidiata* Cerqueira, 1943  
*discolor* (Coquillett, 1903)  
*infinis* (Dyar & Knab, 1906)  
*insularia* (Dyar & Knab, 1906)  
*jamaicensis* Theobald, 1901  
*leucocnemis* Martini, 1931  
*paulli* Paterson & Shannon, 1927  
*pruinosa* Martini, 1935  
*pygmaea* (Theobald, 1903)  
*santamarinai* Broche, 2000  
*signipennis* (Coquillett, 1904)  
*varinervis* Edwards, 1922

Subgenus *Janthinosoma* Lynch Arribáizaga, 1891

*albigenu* (Peryassú, 1908)  
*albipes* (Theobald, 1907)  
*amazonica* Cerqueira, 1960  
*champerico* (Dyar & Knab, 1906)  
*circumflava* Cerqueira, 1943  
*cyanescens* (Coquillett, 1902)  
*discrucians* (Walker, 1856)  
*ferox* (von Humboldt, 1819)  
*fiebrigi* Edwards, 1922  
*forceps* Cerqueira, 1939  
*horrida* (Dyar & Knab, 1908)  
*johnstonii* (Grabham, 1905)  
*lanei* Shannon & Cerqueira, 1943  
*longipalpus* Randolph & O'Neill, 1944  
*lutzii* (Theobald, 1901)  
*mathesoni* Belkin & Heinemann, 1975  
*melanota* Cerqueira, 1943  
*mexicana* (Bellardi, 1859)  
*pilosa* Duret, 1971  
*pseudoalbipes* Duret, 1971  
*pseudomelanota* Barata & Cotrim, 1971  
*totonaci* Lassmann, 1951  
*varipes* (Coquillett, 1904)

Subgenus *Psorophora* Robineau-Desvoidy, 1827

*ciliata* (Fabricius, 1794)  
*cilipes* (Fabricius, 1805)  
*holmbergii* Lynch Arribálzaga, 1891  
*howardii* Coquillett, 1901  
*lineata* (von Humboldt, 1819)  
*ochripes* (Macquart, 1850)  
*pallescens* Edwards, 1922  
*pilipes* (Macquart, 1834)  
*saeva* Dyar & Knab, 1906  
*stonei* Vargas, 1956

*Nomina dubia*

*goeldii* (Giles, 1904)  
*marmorata* (Philippi, 1865)  
*perterrens* (Walker, 1856)

**Genus *Udaya* Thurman, 1954**

*argyrurus* (Edwards, 1934)  
*lucaris* Macdonald & Mattingly, 1960  
*subsimilis* (Barraud, 1927)

**Genus *Verrallina***

Subgenus *Harbachius* Reinert, 1999

*abdita* (Barraud, 1931)  
*consonensis* (Reinert, 1973)  
*fragilis* Leicester, 1908  
*hamistylus* (Laffoon, 1946)  
*indecorabilis* Leicester, 1908  
*nobukonis* (Yamada, 1932)  
*pahangi* (Delfinado, 1968)  
*ramalingami* (Reinert, 1974)  
*robertsi* (Laffoon, 1946)  
*srilankensis* (Reinert, 1977)  
*stunga* (Klein, 1973)  
*uniformis* (Theobald, 1910)  
*yusafi* (Barraud, 1931)

Subgenus *Neomacleaya* Theobald, 1907

*adusta* (Laffoon, 1946)  
*agrestis* (Barraud, 1931)  
*andamanensis* (Edwards, 1922)  
*assamensis* Bhattacharyya, Tewari, Prakash, Mohapatra & Mahanta, 2004  
*atriisimilis* (Tanaka & Mizusawa, 1973)  
*atria* (Barraud, 1928)  
*campylostylus* (Laffoon, 1946)  
*cauta* (Barraud, 1928)  
*clavata* (Barraud, 1931)  
*comata* (Barraud, 1931)  
*comosa* (Reinert, 1974)  
*cretata* (Delfinado, 1967)  
*cyrtolabis* (Edwards, 1928)  
*gibbosa* (Delfinado, 1967)  
*harrisonica* (Reinert, 1974)  
*hispida* (Delfinado, 1967)  
*incertus* (Edwards, 1922)  
*indica* (Theobald, 1907)  
*johnsoni* (Laffoon, 1946)  
*johorensis* (Reinert, 1974)  
*komponga* (Klein, 1973)  
*lankaensis* (Stone & Knight, 1958)  
*latipennis* (Delfinado, 1967)  
*leicesteri* (Edwards, 1917)  
*macrodixoa* (Dyar & Shannon, 1925)  
*margarsen* (Dyar & Shannon, 1925)  
*neomacrodixoa* (King & Hoogstraal, 1947)  
*nigrotarsis* (Ludlow, 1908)  
*notabilis* (Delfinado, 1967)  
*nubicola* (Laffoon, 1946)  
*panayensis* (Ludlow, 1914)  
*petroelephantus* (Wijesundara, 1951)  
*philippinensis* (Delfinado, 1968)  
*phnoma* (Klein, 1973)  
*prioekanensis* (Brug, 1931)  
*protuberans* (Delfinado, 1967)  
*pseudodiurna* (Theobald, 1910)  
*pseudomediofasciata* (Theobald, 1910)  
*pseudovarietas* (Reinert, 1974)  
*rami* (Barraud, 1928)  
*rara* (Delfinado, 1968)  
*sabahensis* (Reinert, 1974)  
*seculata* (Menon, 1950)

*singularis* (Leicester, 1908)  
*sohni* (Reinert, 1974)  
*spermathecus* (Wijesundara, 1951)  
*torosa* (Delfinado, 1967)  
*uncus* (Theobald, 1901)  
*vallistris* (Barraud, 1928)  
*varietas* (Leicester, 1908)  
*virilis* Leicester, 1908  
*yerburyi* (Edwards, 1917)

Subgenus *Verrallina* Theobald, 1903

*azureosquamata* (Bonne-Wepster, 1948)  
*bifoliata* (King & Hoogstraal, 1947)  
*butleri* (Theobald, 1901)  
*carmenti* (Edwards, 1924)  
*cuccioi* (Belkin, 1962)  
*cunninghami* (Taylor, 1944)  
*dux* (Dyar & Shannon, 1925)  
*embiensis* (Huang, 1968)  
*foliformis* (King & Hoogstraal, 1947)  
*funerea* (Theobald, 1903)  
*iriomotensis* (Tanaka & Mizusawa, 1973)  
*killertonis* (Huang, 1968)  
*leilae* (King & Hoogstraal, 1947)  
*lineata* (Taylor, 1914)  
*lugubris* (Barraud, 1928)  
*mccormicki* (Belkin, 1962)  
*milnensis* (King & Hoogstraal, 1947)  
*multifolium* (King & Hoogstraal, 1947)  
*obsoleta* (Huang, 1968)  
*parasimilis* (King & Hoogstraal, 1947)  
*pipkini* (Bohart, 1957)  
*quadrifolium* (Brug, 1934)  
*quadrispinata* (King & Hoogstraal, 1947)  
*reesi* (King & Hoogstraal, 1947)  
*sentania* (King & Hoogstraal, 1947)  
*similis* (Theobald, 1910)  
*simpla* (King & Hoogstraal, 1947)  
*trispinata* (King & Hoogstraal, 1947)  
*vanapa* (Huang, 1968)  
*variabilis* (Huang, 1968)

*Nomen dubium*

*perdita* Leicester, 1908

**Genus *Zeugnomyia* Leicester, 1908**

*aguilari* Baisas & Feliciano, 1953

*fajardoi* Baisas & Feliciano, 1953

*gracilis* Leicester, 1908

*lawtoni* Baisas, 1946
