# Supplementary material for: Making Mosquito Taxonomy Useful: A Stable Classification of Tribe Aedini that Balances Utility with Current Knowledge of Evolutionary Relationships
Source: PubMed Central journal article supplement (PMC4520491; doi:10.1371/journal.pone.0133602), 2015-07-30
Supplement: pone.0133602.s002.pdf [file pone.0133602.s002.pdf]

Table XX. Proposed Informal species groups listed as subgenera in Reinert et al. (2009)

| Reinert et al. (2009)                  | Herein: genus / subgenus      | Suggested informal group prefix or previous group name | Species                           |
|----------------------------------------|-------------------------------|--------------------------------------------------------|-----------------------------------|
| <i>Collessius (Alloeomyia)</i>         | <i>Aedes (Collessius)</i>     | Alloeomyia                                             | <i>banksi</i> Edwards             |
|                                        |                               |                                                        | <i>pseudotaeniatus</i> (Giles)    |
|                                        |                               |                                                        | <i>tonkinensis</i> Galliard & Ngu |
| <i>Collessius (Collessius)</i>         | <i>Aedes (Collessius)</i>     | Collessius                                             | <i>elsiae</i> (Barraud)           |
|                                        |                               |                                                        | <i>elsiae vicarius</i> Lien       |
|                                        |                               |                                                        | <i>hatorii</i> Yamada             |
|                                        |                               |                                                        | <i>macdougalli</i> Edwards        |
|                                        |                               |                                                        | <i>macfarlanei</i> (Edwards)      |
|                                        |                               |                                                        | <i>ningheensis</i> Lei            |
|                                        |                               |                                                        | <i>shortti</i> (Barraud)          |
| <i>Georgecraigius (Georgecraigius)</i> | <i>Aedes (Georgecraigius)</i> | Georgecraigius                                         | <i>atropalpus</i> (Coquillet)     |
|                                        |                               |                                                        | <i>epactius</i> Dyar & Knab       |
| <i>Georgecraigius (Horsfallius)</i>    | <i>Aedes (Georgecraigius)</i> | Horsfallius                                            | <i>fluviatilis</i> (Lutz)         |
| <i>Hopkinsius (Hopkinsius)</i>         | <i>Aedes (Hopkinsius)</i>     | Hopkinsius                                             | <i>barnardi</i> Edwards           |
|                                        |                               |                                                        | <i>embuensis</i> Edwards          |
|                                        |                               |                                                        | <i>ingrami</i> Edwards            |
|                                        |                               |                                                        | <i>nyasae</i> Edwards             |
|                                        |                               |                                                        | <i>wellmanii</i> (Theobald)       |
| <i>Hopkinsius (Yamada)</i>             | <i>Aedes (Hopkinsius)</i>     | Yamada                                                 | <i>albocinctus</i> (Barraud)      |
|                                        |                               |                                                        | <i>seoulensis</i> Yamada          |
| <i>Macleaya (Chaetocruiomya)</i>       | <i>Aedes (Macleaya)</i>       | Chaetocruiomya                                         | <i>calabyi</i> Marks              |
|                                        |                               |                                                        | <i>elchoensis</i> Taylor          |

|                                               |                                      |              |                                           |
|-----------------------------------------------|--------------------------------------|--------------|-------------------------------------------|
|                                               |                                      |              | <i>humeralis</i> Edwards                  |
|                                               |                                      |              | <i>macmillani</i> Marks                   |
|                                               |                                      |              | <i>moloiensis</i> Taylor                  |
|                                               |                                      |              | <i>spinosipes</i> Edwards                 |
|                                               |                                      |              | <i>tulliae</i> (Taylor)                   |
|                                               |                                      |              | <i>wattensis</i> Taylor                   |
| <i>Macleaya</i> ( <i>Macleaya</i> )           | <i>Aedes</i> ( <i>Macleaya</i> )     | Macleaya     | <i>littlechildi</i> Taylor                |
|                                               |                                      |              | <i>stoneorum</i> Marks                    |
|                                               |                                      |              | <i>tremulus</i> (Theobald)                |
| <i>Mucidus</i> ( <i>Mucidus</i> )             | <i>Aedes</i> ( <i>Mucidus</i> )      | Mucidus      | <i>alternans</i> (Westwood)               |
|                                               |                                      |              | <i>ferinus</i> Knight                     |
|                                               |                                      |              | <i>grahamii</i> (Theobald)                |
|                                               |                                      |              | <i>laniger</i> (Wiedemann)                |
|                                               |                                      |              | <i>lucianus</i> Muspratt                  |
|                                               |                                      |              | <i>mucidus</i> (Karsch)                   |
|                                               |                                      |              | <i>nigerrimus</i> (Theobald)              |
|                                               |                                      |              | <i>quasiferinus</i> Mattingly             |
|                                               |                                      |              | <i>scatophagoides</i><br>(Theobald)       |
|                                               |                                      |              | <i>sudanensis</i> (Theobald)              |
|                                               |                                      |              | <i>tonkingi</i> Gebert                    |
| <i>Mucidus</i> ( <i>Pardomyia</i> )           | <i>Aedes</i> ( <i>Mucidus</i> )      | Pardomyia    | <i>aurantius</i> (Theobald)               |
|                                               |                                      |              | <i>aurantius chrysogaster</i><br>(Taylor) |
|                                               |                                      |              | <i>nigrescens</i><br>(Edwards)            |
|                                               |                                      |              | <i>quadripunctis</i> (Ludlow)             |
| <i>Ochlerotatus</i> ( <i>Buvirilia</i> )      | <i>Aedes</i> ( <i>Ochlerotatus</i> ) | Buvirilia    | <i>edgari</i> Stone & Rosen               |
| <i>Ochlerotatus</i><br>( <i>Crysoconops</i> ) | <i>Aedes</i> ( <i>Ochlerotatus</i> ) | Chrysoconops | <i>bimaculatus</i> (Coquillett)           |
|                                               |                                      |              | <i>fulvus</i> (Wiedemann)                 |
|                                               |                                      |              | <i>fulvus pallens</i> (Ross)              |

|                                    |                             |              |                                         |
|------------------------------------|-----------------------------|--------------|-----------------------------------------|
|                                    |                             |              | <i>jorgi</i> Carpintero & Lequizamón    |
|                                    |                             |              | <i>pennai</i> Antunes & Lane            |
|                                    |                             |              | <i>stigmaticus</i> Edwards              |
| <i>Ochlerotatus (Culicada)</i>     | <i>Aedes (Ochlerotatus)</i> | Culicada     | <i>canadensis</i> (Theobald)            |
|                                    |                             |              | <i>canadensis mathesoni</i> Middlekauff |
| <i>Ochlerotatus (Culicelsa)</i>    | <i>Aedes (Ochlerotatus)</i> | Culicelsa    | <i>mitchellae</i> (Dyar)                |
|                                    |                             |              | <i>nigromaculis</i> (Ludlow)            |
|                                    |                             |              | <i>sollicitans</i> (Walker)             |
|                                    |                             |              | <i>taeniorhynchus</i> (Wiedemann)       |
| <i>Ochlerotatus (Empihals)</i>     | <i>Aedes (Ochlerotatus)</i> | Empihals     | <i>vigilax</i> (Skuse)                  |
|                                    |                             |              | <i>vigilax ludlowae</i> (R. Blanchard)  |
|                                    |                             |              | <i>vigilax vansomerenae</i> Mattingly   |
| <i>Ochlerotatus (Gilesia)</i>      | <i>Aedes (Ochlerotatus)</i> | Gilesia      | <i>aculeatus</i> (Theobald)             |
|                                    |                             |              | <i>mcdonaldi</i> Belkin                 |
|                                    |                             |              | <i>purpuraceus</i> Brug                 |
| <i>Ochlerotatus (Juppius)</i>      | <i>Aedes (Ochlerotatus)</i> | Juppius      | <i>caballus</i> (Theobald)              |
|                                    |                             |              | <i>chelli</i> (Edwards)                 |
|                                    |                             |              | <i>juppi</i> McIntosh                   |
| <i>Ochlerotatus (Lepidokeneon)</i> | <i>Aedes (Ochlerotatus)</i> | Lepidokeneon | <i>spilotus</i> Marks                   |
|                                    |                             |              | <i>stricklandi</i> (Edwards)            |
|                                    |                             |              | <i>turneri</i> Marks                    |
| <i>Ochlerotatus (Ochlerotatus)</i> | <i>Aedes (Ochlerotatus)</i> | Ochlerotatus | <i>angustivittatus</i> Dyar & Knab      |
|                                    |                             |              | <i>atactavittatus</i> Arnell            |
|                                    |                             |              | <i>auratus</i> Grabham                  |
|                                    |                             |              | <i>bogotanus</i> (Arnell)               |

|                                  |                             |            |                                            |
|----------------------------------|-----------------------------|------------|--------------------------------------------|
|                                  |                             |            | <i>comitatus</i> Arnell                    |
|                                  |                             |            | <i>condolescens</i> Dyar & Knab            |
|                                  |                             |            | <i>crinifer</i> (Theobald)                 |
|                                  |                             |            | <i>deficiens</i> Arnell                    |
|                                  |                             |            | <i>euplocamus</i> Dyar & Knab              |
|                                  |                             |            | <i>incomptus</i> Arnell                    |
|                                  |                             |            | <i>infirmatus</i> Dyar & Knab              |
|                                  |                             |            | <i>meprai</i> Martinez & Prosen            |
|                                  |                             |            | <i>obturbator</i> Dyar & Knab              |
|                                  |                             |            | <i>patersoni</i> Shannon & del Ponte       |
|                                  |                             |            | <i>pectinatus</i> Arnell                   |
|                                  |                             |            | <i>phaeonotus</i> (Arnell)                 |
|                                  |                             |            | <i>raymondi</i> del Ponte, Castro & Garcia |
|                                  |                             |            | <i>rhyacophilus</i> da Costa Lima          |
|                                  |                             |            | <i>scapularis</i> (Rondani)                |
|                                  |                             |            | <i>synchytus</i> Arnell                    |
|                                  |                             |            | <i>thelcter</i> Dyar                       |
|                                  |                             |            | <i>tortilis</i> (Theobald)                 |
|                                  |                             |            | <i>trivittatus</i> (Coquillett)            |
| <i>Ochlerotatus (Pholeomyia)</i> | <i>Aedes (Ochlerotatus)</i> | Pholeomyia | <i>calcariae</i> Marks                     |
|                                  |                             |            | <i>clelandi</i> (Taylor)                   |
|                                  |                             |            | <i>flavifrons</i> (Skuse)                  |
|                                  |                             |            | <i>purpuriventris</i> Edwards              |
| <i>Ochlerotatus (Protoculex)</i> | <i>Aedes (Ochlerotatus)</i> | Protoculex | <i>aenigmaticus</i> Cerqueira & Costa      |
|                                  |                             |            | <i>atlanticus</i> Dyar & Knab              |
|                                  |                             |            | <i>dupreei</i> (Coquillett)                |
|                                  |                             |            | <i>eucephalaeus</i> Dyar                   |
|                                  |                             |            | <i>hastatus</i> Dyar                       |

|                                                          |                                           |                   |                                          |
|----------------------------------------------------------|-------------------------------------------|-------------------|------------------------------------------|
|                                                          |                                           |                   | <i>nubilis</i> Theobald                  |
|                                                          |                                           |                   | <i>oligopistus</i> Dyar                  |
|                                                          |                                           |                   | <i>pertinax</i> Grabham                  |
|                                                          |                                           |                   | <i>serratus</i> (Theobald)               |
|                                                          |                                           |                   | <i>tormentor</i> Dyar & Knab             |
| <i>Ochlerotatus</i><br>( <i>Pseudoskusea</i> )           | <i>Aedes</i> ( <i>Ochlerotatus</i> )      | Pseudoskusea      | <i>bancroftianus</i> Edwards             |
|                                                          |                                           |                   | <i>culiciformis</i> (Theobald)           |
|                                                          |                                           |                   | <i>multiplex</i> (Theobald)              |
|                                                          |                                           |                   | <i>postspiraculosus</i><br>Dobrotworsky  |
| <i>Ochlerotatus</i> ( <i>Rusticoidus</i> )               | <i>Aedes</i> ( <i>Ochlerotatus</i> )      | Rusticoidus       | <i>albescens</i> Edwards                 |
|                                                          |                                           |                   | <i>bicristatus</i> Thurman &<br>Winkler  |
|                                                          |                                           |                   | <i>krymmontanus</i> Alekseev             |
|                                                          |                                           |                   | <i>lepidonotus</i> Edwards               |
|                                                          |                                           |                   | <i>provocans</i> (Walker)                |
|                                                          |                                           |                   | <i>quasirusticus</i> Torres<br>Cañamares |
|                                                          |                                           |                   | <i>refiki</i> Medschid                   |
|                                                          |                                           |                   | <i>rusticus</i> (Rossi)                  |
|                                                          |                                           |                   | <i>rusticus subtrichurus</i><br>Martini  |
|                                                          |                                           |                   | <i>subdiversus</i> Martini               |
| <i>Ochlerotatus</i> ( <i>Woodius</i> )                   | <i>Aedes</i> ( <i>Ochlerotatus</i> )      | Woodius           | <i>diantaeus</i> Howard, Dyar &<br>Knab  |
|                                                          |                                           |                   | <i>intrudens</i> Dyar                    |
| <i>Petermattinglyius</i><br>( <i>Aglaonotus</i> )        | <i>Aedes</i> ( <i>Petermattinglyius</i> ) | Aglaonotus        | <i>whartoni</i> Mattingly                |
| <i>Petermattinglyius</i><br>( <i>Petermattinglyius</i> ) | <i>Aedes</i> ( <i>Petermattinglyius</i> ) | Petermattinglyius | <i>franciscoi</i> Mattingly              |
|                                                          |                                           |                   | <i>iyengari</i> Edwards                  |

|                                  |                          |                                         |                                           |
|----------------------------------|--------------------------|-----------------------------------------|-------------------------------------------|
|                                  |                          |                                         | <i>punctipes</i> Edwards                  |
|                                  |                          |                                         | <i>scanloni</i> Reinert                   |
| <i>Stegomyia (Actinothrix)</i>   | <i>Aedes (Stegomyia)</i> | Actinothrix                             | <i>edwardsi</i> (Barraud)                 |
|                                  |                          |                                         | <i>robinsoni</i> Belkin                   |
|                                  |                          |                                         | <i>seampi</i> Huang                       |
|                                  |                          |                                         | <i>tulagiensis</i> Edwards                |
| <i>Stegomyia (Bohartius)</i>     | <i>Aedes (Stegomyia)</i> | Pandani Subgroup of Bohart (1957)       | <i>agrihanensis</i> Bohart                |
|                                  |                          |                                         | <i>neopandani</i> Bohart                  |
|                                  |                          |                                         | <i>pandani</i> Stone                      |
|                                  |                          |                                         | <i>rotanus</i> Bohart & Ingram            |
|                                  |                          |                                         | <i>saipanensis</i> Stone                  |
| <i>Stegomyia (Heteraspidion)</i> | <i>Aedes (Stegomyia)</i> | Annandalei Subgroup of Huang (1977)     | <i>annandalei</i> (Theobald)              |
|                                  |                          |                                         | <i>craggi</i> (Barraud)                   |
| <i>Stegomyia (Huangmyia)</i>     | <i>Aedes (Stegomyia)</i> | Mediopunctatus Subgroup of Huang (1977) | <i>malikuli</i> Huang                     |
|                                  |                          |                                         | <i>mediopunctatus</i> (Theobald)          |
|                                  |                          |                                         | <i>mediopunctatus sureilensis</i> Barraud |
|                                  |                          |                                         | <i>perplexus</i> (Leicester)              |
| <i>Stegomyia (Mukwaya)</i>       | <i>Aedes (Stegomyia)</i> | Simpsoni Group of Huang (2004)          | <i>bromeliae</i> (Theobald)               |
|                                  |                          |                                         | <i>gandaensis</i> Huang                   |
|                                  |                          |                                         | <i>josiahae</i> Huang                     |
|                                  |                          |                                         | <i>kivuensis</i> Edwards                  |
|                                  |                          |                                         | <i>lilii</i> (Theobald)                   |
|                                  |                          |                                         | <i>sampi</i> Huang                        |
|                                  |                          |                                         | <i>simpsoni</i> (Theobald)                |
|                                  |                          |                                         | <i>strelitziae</i> Muspratt               |
|                                  |                          |                                         | <i>subargenteus</i> Edwards               |
