# Supplementary material for: Making Mosquito Taxonomy Useful: A Stable Classification of Tribe Aedini that Balances Utility with Current Knowledge of Evolutionary Relationships
Source: PubMed Central journal article supplement (PMC4520491; doi:10.1371/journal.pone.0133602), 2015-07-30
Supplement: pone.0133602.s003.pdf [file pone.0133602.s003.pdf]

S3 Appendix. Updated mosquito generic (two letters) and subgeneric (three letters) abbreviations. Based on: Reinert JF (2009) List of abbreviations for currently valid generic-level taxa in family Culicidae (Diptera). European Mosquito Bulletin 27: 68-76.

\* = Used here for the first time

#### Subfamily Anophelinae

Genus *Anopheles* Meigen = *An.*

Subgenus *Anopheles* Meigen = *Ano.*

Subgenus *Baimaia* Harbach, Rattanarithikul & Harrison = *Bmi.*

Subgenus *Cellia* Theobald = *Cel.*

Subgenus *Kerteszia* Theobald = *Ker.*

Subgenus *Lophopodomyia* Antunes = *Lph.*

Subgenus *Nyssorhynchus* Blanchard = *Nys.*

Subgenus *Stethomyia* Theobald = *Ste.*

Genus *Bironella* Theobald = *Bi.*

Genus *Chagasia* Cruz = *Ch.*

#### Subfamily Culicinae

##### Tribe Aedeomyiini

Genus *Aedeomyia* Theobald = *Ad.*

Subgenus *Aedeomyia* Theobald = *Ady.*

Subgenus *Lepiothauma* Enderlein = *Lpi.*

##### Tribe Aedini

Genus *Aedes* Meigen = *Ae.*

Subgenus *Abraedes* Zavortink = *Abr.*

Subgenus *Acartomyia* Theobald = *Acy.*

Subgenus *Aedimorphus* Theobald = *Adm.*

Subgenus *Alanstonea* Mattingly = *Ala.*

Subgenus *Albuginosus* Reinert = *Alb.*

Subgenus *Ayurakitia* Thurman = *Ayu.*

Subgenus *Aztecaedes* Zavortink = *Azt.*

Subgenus *Belkinius* Reinert = *Blk.*

Subgenus *Bifidistylus* Reinert, Harbach & Kitching = *Bif.\**

Subgenus *Borichinda* Harbach & Rattanarithikul = *Bor.\**

Subgenus *Bothaella* Reinert = *Bot.*

Subgenus *Bruceharrisonius* Reinert = *Brh.*

Subgenus *Cancraedes* Edwards = *Can*.  
Subgenus *Catageomyia* Theobald = *Cat*.\*  
Subgenus *Catatassomyia* Dyar & Shannon = *Cts*.\*  
Subgenus *Christophersiomyia* Barraud = *Chr*.  
Subgenus *Collessius* Reinert, Harbach & Kitching = *Col*.  
Subgenus *Cornetius* Huang = *Cor*.  
Subgenus *Dahlia* Reinert, Harbach & Kitching = *Dah*.\*  
Subgenus *Danielsia* Theobald = *Dan*.\*  
Subgenus *Dendroskusea* Edwards = *Dsk*.\*  
Subgenus *Diceromyia* Theobald = *Dic*.  
Subgenus *Dobrotworskyius* Reinert, Harbach & Kitching = *Dob*.\*  
Subgenus *Downsiomyia* Vargas = *Dow*.\*  
Subgenus *Edwardsaedes* Belkin = *Edw*.  
Subgenus *Elpeytonius* Reinert, Harbach & Kitching = *Elp*.\*  
Subgenus *Finlaya* Theobald = *Fin*.  
Subgenus *Fredwardsius* Reinert = *Fre*.  
Subgenus *Georgecraigius* Reinert, Harbach & Kitching = *Grg*.\*  
Subgenus *Geoskusea* Edwards = *Geo*.  
Subgenus *Gilesius* Reinert, Harbach & Kitching = *Gil*.\*  
Subgenus *Gymnometopa* Coquillett = *Gym*.  
Subgenus *Halaedes* Belkin = *Hal*.  
Subgenus *Himalaius* Reinert, Harbach & Kitching = *Him*.\*  
Subgenus *Hopkinsius* Reinert, Harbach & Kitching = *Hop*.\*  
Subgenus *Howardina* Theobald = *How*.  
Subgenus *Huaedes* Huang = *Hua*.  
Subgenus *Hulecoeteomyia* Theobald = *Hul*.\*  
Subgenus *Indusius* Edwards = *Ind*.  
Subgenus *Isoaedes* Reinert = *Isa*.  
Subgenus *Jarnellius* Reinert, Harbach & Kitching = *Jar*.\*  
Subgenus *Jihlienius* Reinert, Harbach & Kitching = *Jih*.\*  
Subgenus *Kenknightia* Reinert = *Ken*.  
Subgenus *Kompia* Aitken = *Kom*.  
Subgenus *Leptosomatomyia* Theobald = *Lep*.  
Subgenus *Levua* Stone & Bohart = *Lev*.  
Subgenus *Lewnielsenius* Reinert, Harbach & Kitching = *Lew*.  
Subgenus *Lorrainea* Belkin = *Lor*.  
Subgenus *Luius* Reinert, Harbach & Kitching = *Lui*.\*  
Subgenus *Macleaya* Theobald = *Mac*.  
Subgenus *Molpemyia* Theobald = *Mol*.  
Subgenus *Mucidus* Theobald = *Muc*.  
Subgenus *Neomelaniconion* Newstead = *Neo*.  
Subgenus *Nyctomyia* Harbach & Linton = *Nyc*.  
Subgenus *Ochlerotatus* Lynch Arribálzaga = *Och*.  
Subgenus *Paraedes* Edwards = *Par*.  
Subgenus *Patmarksia* Reinert, Harbach & Kitching = *Pat*.\*  
Subgenus *Petermattinglyius* Reinert, Harbach & Kitching = *Pet*.\*

Subgenus *Phagomyia* Theobald = *Phg.*\*  
Subgenus *Polyleptiomyia* Theobald = *Pmt.*\*  
Subgenus *Pseudarmigeres* Stone & Knight = *Psa.*  
Subgenus *Rampamyia* Reinert, Harbach & Kitching = *Ram.*\*  
Subgenus *Rhinokusea* Edwards = *Rhi.*  
Subgenus *Sallumia* Reinert, Harbach & Kitching = *Sal.*  
Subgenus *Scutomyyia* Theobald = *Sct.*  
Subgenus *Skusea* Theobald = *Sku.*  
Subgenus *Stegomyia* Theobald = *Stg.*  
Subgenus *Tanakaius* Reinert, Harbach & Kitching = *Tan.*\*  
Subgenus *Tewarius* Reinert = *Tew.*\*  
Subgenus *Vansomerenis* Reinert, Harbach & Kitching = *Van.*

Genus *Armigeres* Theobald = *Ar.*  
Subgenus *Armigeres* Theobald = *Arm.*  
Subgenus *Leicesteria* Theobald = *Lei.*

Genus *Eretmapodites* Theobald = *Er.*

Genus *Haemagogus* Williston = *Hg.*  
Subgenus *Conopostegus* Dyar = *Con.*  
Subgenus *Haemagogus* Williston = *Hag.*

Genus *Heizmannia* Ludlow = *Hg.*  
Subgenus *Heizmannia* Ludlow = *Hez.*  
Subgenus *Mattinglyia* Lien = *Mat.*

Genus *Opifex* Hutton = *Op.*  
Subgenus *Nothoskusea* Dumbleton = *Not.*  
Subgenus *Opifex* Hutton = *Opi.*

Genus *Psorophora* Robineau-Desvoidy = *Ps.*  
Subgenus *Grabhamia* Theobald = *Gra.*  
Subgenus *Janthinosoma* Lynch Arribálzaga = *Jan.*  
Subgenus *Psorophora* Robineau-Desvoidy = *Pso.*

Genus *Udaya* Thurman = *Ud.*

Genus *Verrallina* Theobald = *Ve.*  
Subgenus *Harbachius* Reinert = *Har.*  
Subgenus *Neomacleaya* Theobald = *Nma.*  
Subgenus *Verrallina* Theobald = *Ver.*

Genus *Zavortinkius* Reinert = *Za.*

Genus *Zeugomyia* Leicester = *Ze.*

## Tribe Culicini

Genus *Culex* Linnaeus = *Cx.*

Subgenus *Acalleomyia* Leicester = *Aca.*

Subgenus *Acallyntrum* Stone & Penn = *Acl.*

Subgenus *Aedinus* Lutz = *Ads.*

Subgenus *Afrocullex* Danilov = *Afc.*

Subgenus *Allimanta* Casal & Garcia = *Alm.*

Subgenus *Anoedioporpa* Dyar = *And.*

Subgenus *Barraudius* Edwards = *Bar.*

Subgenus *Belkinomyia* Adames & Galindo = *Bel.*

Subgenus *Carrollia* Lutz = *Car.*

Subgenus *Culex* Linnaeus = *Cux.*

Subgenus *Culiciomyia* Theobald = *Cui.*

Subgenus *Eumelanomyia* Theobald = *Eum.*

Subgenus *Kitzmilleria* Danilov = *Kit.*

Subgenus *Lasiosiphon* Kirkpatrick = *Las.*

Subgenus *Lophoceraomyia* Theobald = *Lop.*

Subgenus *Maillotia* Theobald = *Mai.*

Subgenus *Melanoconion* Theobald = *Mel.*

Subgenus *Micraedes* Coquillett = *Mca.*

Subgenus *Microcullex* Theobald = *Mcx.*

Subgenus *Neocullex* Dyar = *Ncx.*

Subgenus *Nicaromyia* Broche & Rodríguez Rodríguez = *Nic.*

Subgenus *Oculeomyia* Theobald = *Ocu.*

Subgenus *Phenacomyia* Harbach & Peyton = *Phc.*

Subgenus *Phytotelmatomyia* Rossi & Harbach = *Phy.*

Subgenus *Sirivanakarnius* Tanaka = *Sir.*

Subgenus *Tinolestes* Coquillett = *Tin.*

Genus *Deinocerites* Theobald = *De.*

Genus *Galindomyia* Stone & Barreto = *Ga.*

Genus *Lutzia* Theobald = *Lt.*

Subgenus *Insulalutzia* Tanaka = *Ilt.*

Subgenus *Metalutzia* Tanaka = *Mlt.*

Subgenus *Lutzia* Theobald = *Lut.*

## Tribe Culisetini

Genus *Culiseta* Felt = *Cs.*

Subgenus *Allotheobaldia* Broelemann = *All.*

Subgenus *Austrotheobaldia* Dobrotworsky = *Aut.*

Subgenus *Climacura* Howard, Dyar & Knab = *Cli.*

Subgenus *Culicella* Felt = *Cuc.*  
Subgenus *Culiseta* Felt = *Cus.*  
Subgenus *Neotheobaldia* Dobrotworsky = *Net.*  
Subgenus *Theomyia* Edwards = *Thm.*

#### Tribe Ficalbiini

Genus *Ficalbia* Theobald = *Fi.*

Genus *Mimomyia* Theobald = *Mi.*  
Subgenus *Etorleptomyia* Theobald = *Eto.*  
Subgenus *Ingramia* Edwards = *Ing.*  
Subgenus *Mimomyia* Theobald = *Mim.*

#### Tribe Hodgesiini

Genus *Hodgesia* Theobald = *Ho.*

#### Tribe Mansoniini

Genus *Coquillettidia* Dyar = *Cq.*  
Subgenus *Austromansonia* Belkin = *Aus.*  
Subgenus *Coquillettidia* Dyar = *Coq.*  
Subgenus *Rhynchotaenia* Brethés = *Rhy.*

Genus *Mansonia* Blanchard = *Ma.*  
Subgenus *Mansonia* Blanchard = *Man.*  
Subgenus *Mansonioides* Theobald = *Mnd.*

#### Tribe Orthopodomyiini

Genus *Orthopodomyia* Theobald = *Or.*

#### Tribe Sabethini

Genus *Isostomyia* Coquillett = *Is.*

Genus *Johnbelkinia* Zavortink = *Jb.*

Genus *Kimia* Vu Duc Huong & Harbach = *Km.*

Genus *Limatus* Theobald = *Li.*

Genus *Malaya* Leicester = *Ml.*

Genus *Maorigoeldia* Edwards = *Mg.*

Genus *Onirion* Harbach & Peyton = *On*.

Genus *Runchomyia* Theobald = *Ru*.

Subgenus *Ctenogoeldia* Edwards = *Cte*.

Subgenus *Runchomyia* Theobald = *Run*.

Genus *Sabethes* Robineau-Desvoidy = *Sa*.

Subgenus *Davismyia* Lane & Cerqueira = *Dav*.

Subgenus *Peytonulus* Harbach = *Pey*.

Subgenus *Sabethes* Robineau-Desvoidy = *Sab*.

Subgenus *Sabethinus* Lutz = *Sbn*.

Subgenus *Sabethoides* Theobald = *Sbo*.

Genus *Shannoniana* Lane & Cerqueira = *Sh*.

Genus *Topomyia* Leicester = *To*.

Subgenus *Miyagiella* Harbach = *Myg*.

Subgenus *Suaymyia* Thurman = *Sua*.

Subgenus *Topomyia* Leicester = *Top*.

Genus *Trichoprosopon* Theobald = *Tr*.

Genus *Tripteroides* Giles = *Tp*.

Subgenus *Polylepidomyia* Theobald = *Pol*.

Subgenus *Rachionotomyia* Theobald = *Rah*.

Subgenus *Rachisoura* Theobald = *Rac*.

Subgenus *Tricholeptomyia* Dyar & Shannon = *Tri*.

Subgenus *Tripteroides* Giles = *Trp*.

Genus *Wyeomyia* Theobald = *Wy*.

Subgenus *Antunesmyia* Lane & Cerqueira = *Ant*.

Subgenus *Caenomyiella* Harbach & Peyton = *Cae*.

Subgenus *Cruzmyia* Lane & Cerqueira = *Cru*.

Subgenus *Decamyia* Dyar = *Dec*.

Subgenus *Dendromyia* Theobald = *Den*.

Subgenus *Dodecamyia* Dyar = *Dod*.

Subgenus *Exallomyia* Harbach & Peyton = *Exm*.

Subgenus *Hystatomyia* Dyar = *Hys*.

Subgenus *Menolepis* Lutz = *Men*.

Subgenus *Nunezia* Dyar = *Nuz*.

Subgenus *Phoniomyia* Theobald = *Pho*.

Subgenus *Prosopolepis* Lutz = *Prl*.

Subgenus *Spilonympha* Motta & Lourenço-de-Oliveira = *Spi*.

Subgenus *Wyeomyia* Theobald = *Wyo*.

Subgenus *Zinzala* Zavortink = *Zin*.

Tribe Toxorhynchitini

- Genus *Toxorhynchites* Theobald = *Tx.*
- Subgenus *Afrorhynchus* Ribeiro = *Afr.*
- Subgenus *Ankylorhynchus* Lutz = *Ank.*
- Subgenus *Lynchiella* Lahille = *Lyn.*
- Subgenus *Toxorhynchites* Theobald = *Tox.*

Tribe Uranotaeniini

- Genus *Uranotaenia* Lynch Arribálzaga = *Ur.*
- Subgenus *Pseudoficalbia* Theobald = *Pfc.*
- Subgenus *Uranotaenia* Lynch Arribálzaga = *Ura.*
