# Supplementary material for: Making Mosquito Taxonomy Useful: A Stable Classification of Tribe Aedini that Balances Utility with Current Knowledge of Evolutionary Relationships
Source: PubMed Central journal article supplement (PMC4520491; doi:10.1371/journal.pone.0133602), 2015-07-30
Supplement: pone.0133602.s004.pdf [file pone.0133602.s004.pdf]

S1 Fig. Valid generic level names and graphical timeline of nomenclature combination changes in Aedine taxa pre-2000 to date. Genera are indicated in blue, subgenera in green and synonymy (Syn.) in red. Author abbreviations include: D & S = Dyar and Shannon; H & R = Harbach & Rattarithikul; R-D = Robineau-Desvoidy R, H & K = Reinert, Harbach & Kitching; S & P = Shevchenko & Prudkina. Generic abbreviations follow those in Reinert, Harbach & Kitching (2009) and herein as listed in S3 Appendix. \**Nyctomyia* is a replacement name for the originally pre-occupied genus name *Nyx* (Harbach *et al.*, *Zootaxa*, 3683(2), 159-177 (2013).

| Aedini valid generic level names          | Pre-2000        | 2000                 | 2003               | 2004       | 2006             | 2007 | 2008                   | 2009                             | 2013                             | Herein                       |
|-------------------------------------------|-----------------|----------------------|--------------------|------------|------------------|------|------------------------|----------------------------------|----------------------------------|------------------------------|
| <i>Abraedes</i><br>Zavortink 1970         | Ae.<br>(Abr.)   | Oc. (Abr.)           |                    | Abraedes   |                  |      |                        |                                  |                                  | Aedes (Abraedes)             |
| <i>Acartomyia</i><br>Theobald 1903        | Syn. Ae. (Och.) |                      |                    |            |                  |      | Oc.<br>(Acy.)          | Acartomyia                       | Aedes (Acartomyia)               |                              |
| <i>Aedes</i><br>Meigen 1818               | Ae.             |                      |                    |            |                  |      |                        |                                  |                                  | Aedes                        |
| <i>Aedimorphus</i><br>Theobald 1903       | Ae. (Adm.)      |                      |                    |            |                  |      |                        | Aedimorphus                      | Aedes (Aedimorphus)              |                              |
| <i>Aglaonotus</i><br>R, H & K 2009        |                 |                      |                    |            |                  |      |                        | Petermattinglius<br>(Aglaonotus) | Syn. Aedes<br>(Petermattinglius) |                              |
| <i>Alloeomyia</i><br>R, H & K 2008        |                 |                      |                    |            |                  |      | Collesius (Alloeomyia) | Syn. Aedes<br>(Collessius)       |                                  |                              |
| <i>Alanstonea</i><br>Mattingly 1960       | Ae. (Ala.)      |                      | Alanstonea         |            |                  |      |                        |                                  | Aedes (Alanstonea)               |                              |
| <i>Albuginosus</i><br>Reinert 1987        | Ae. (Alb.)      |                      | Albuginosus        |            |                  |      |                        |                                  | Aedes (Albuginosus)              |                              |
| <i>Armigeres</i><br>Theobald 1901         | Armigeres       |                      |                    |            |                  |      |                        |                                  |                                  | Armigeres                    |
| <i>Ayurakitia</i><br>Thurman 1954         | Ae.<br>(Ayu.)   | Ayurakitia           |                    |            |                  |      |                        |                                  | Aedes (Ayurakitia)               |                              |
| <i>Aztecaedes</i><br>Zavortink 1972       | Ae.<br>(Azt.)   | Oc. (Azt.)           |                    | Aztecaedes |                  |      |                        |                                  |                                  | Aedes (Aztecaedes)           |
| <i>Belkinus</i><br>Reinert 1982           | Ae. (Blk.)      |                      | Belkinus           |            |                  |      |                        |                                  | Aedes (Belkinus)                 |                              |
| <i>Bifidistylus</i><br>R, H & K 2009      |                 |                      |                    |            |                  |      |                        | Bifidistylus                     | Aedes (Bifidistylus)             |                              |
| <i>Bohartius</i><br>R, H & K 2009         |                 |                      |                    |            |                  |      |                        | Stegomyia<br>(Bohartius)         | Syn. Aedes<br>(Stegomyia)        |                              |
| <i>Borichinda</i><br>H & R 2007           |                 |                      |                    |            | Borichinda       |      |                        |                                  |                                  | Aedes (Borichinda)           |
| <i>Bothaella</i><br>Reinert 1973          | Ae. (Bot.)      |                      | Bothaella          |            |                  |      |                        |                                  | Aedes (Bothaella)                |                              |
| <i>Bruceharrisonius</i><br>Reinert 2003   |                 |                      | Oc. (Brh.)         |            | Bruceharrisonius |      |                        |                                  |                                  | Aedes<br>(Bruceharrisonius)  |
| <i>Buvirilia</i><br>R, H & K 2008         |                 |                      |                    |            |                  |      | Oc. (Buvirilia)        | Syn. Aedes<br>(Ochlerotatus)     |                                  |                              |
| <i>Canraedes</i><br>Edwards 1929          | Ae. (Can.)      |                      |                    |            |                  |      |                        | Canraedes                        | Aedes (Canraedes)                |                              |
| <i>Catageiomyia</i><br>Theobald 1903      | Syn. Ae. (Adm.) |                      |                    |            |                  |      |                        | Catageiomyia                     | Aedes<br>(Catageiomyia)          |                              |
| <i>Catatassomyia</i><br>D & S 1925        | Syn. Ae. (Stg.) |                      |                    |            |                  |      |                        | Catatassomyia                    | Aedes<br>(Catatassomyia)         |                              |
| <i>Chaetocruimyia</i><br>Theobald 1910    | Ae.<br>(Cha.)   | Oc. (Chaetocruimyia) |                    |            |                  |      |                        |                                  |                                  | Syn. Aedes<br>(Ochlerotatus) |
| <i>Christophersiomyia</i><br>Barraud 1923 | Ae. (Chr.)      |                      | Christophersiomyia |            |                  |      |                        |                                  | Aedes<br>(Christophersiomyia)    |                              |
| <i>Chrysoconops</i><br>Goeldi 1905        | Syn. Ae. (Och.) |                      |                    |            |                  |      | Oc. (Chrysoconops)     | Syn. Aedes<br>(Ochlerotatus)     |                                  |                              |
| <i>Collessius</i><br>R, H & K 2006        |                 |                      |                    |            | Collessius       |      |                        |                                  |                                  | Aedes (Collessius)           |

| Aedini valid generic level names        | Pre-2000                         | 2000                | 2003                | 2004               | 2006                   | 2007 | 2008                   | 2009                             | 2013                             | Herein                           |                             |
|-----------------------------------------|----------------------------------|---------------------|---------------------|--------------------|------------------------|------|------------------------|----------------------------------|----------------------------------|----------------------------------|-----------------------------|
| <i>Conopostegus</i><br>Dyar 1925        | <i>Haemagogus (Conopostegus)</i> |                     |                     |                    |                        |      |                        |                                  |                                  | <i>Haemagogus (Conopostegus)</i> |                             |
| <i>Cornetius</i><br>Huang 2005          |                                  |                     |                     |                    |                        |      |                        | <i>Cornetius</i>                 | <i>Aedes (Cornetius)</i>         |                                  |                             |
| <i>Culicada</i><br>Felt 1904            | Syn. Ae. ( <i>Och.</i> )         |                     |                     |                    |                        |      |                        | <i>Oc. (Culicada)</i>            | Syn. <i>Aedes (Ochlerotatus)</i> |                                  |                             |
| <i>Culicelsa</i><br>Felt 1904           | Syn. Ae. ( <i>Och.</i> )         |                     |                     |                    |                        |      | <i>Oc. (Culicelsa)</i> | Syn. <i>Aedes (Ochlerotatus)</i> |                                  |                                  |                             |
| <i>Dahlia</i><br>R, H & K 2006          |                                  |                     |                     |                    | <i>Dahlia</i>          |      |                        |                                  | <i>Aedes (Dahlia)</i>            |                                  |                             |
| <i>Danielsia</i><br>Theobald 1904       | Syn. Ae. ( <i>Fin.</i> )         |                     |                     |                    |                        |      | <i>Danielsia</i>       | <i>Aedes (Danielsia)</i>         |                                  |                                  |                             |
| <i>Dendroskusea</i><br>Edwards 1929     | Syn. Ae. ( <i>Dic.</i> )         |                     |                     |                    |                        |      |                        | <i>Dendroskusea</i>              | <i>Aedes (Dendroskusea)</i>      |                                  |                             |
| <i>Diceromyia</i><br>Theobald 1911      | <i>Ae. (Dic.)</i>                | <i>Diceromyia</i>   |                     |                    |                        |      |                        |                                  |                                  |                                  | <i>Aedes (Diceromyia)</i>   |
| <i>Dobrotworskyius</i><br>R, H & K 2006 |                                  |                     |                     |                    | <i>Dobrotworskyius</i> |      |                        |                                  | <i>Aedes (Dobrotworskyius)</i>   |                                  |                             |
| <i>Downsiomyia</i><br>Vargas 1950       | Syn. Ae. ( <i>Fin.</i> )         |                     |                     | <i>Downsiomyia</i> |                        |      |                        |                                  |                                  | <i>Aedes (Downsiomyia)</i>       |                             |
| <i>Edwardsaedes</i><br>Belkin 1962      | <i>Ae. (Edw.)</i>                | <i>Edwardsaedes</i> |                     |                    |                        |      |                        |                                  |                                  |                                  | <i>Aedes (Edwardsaedes)</i> |
| <i>Elpeytonius</i><br>R, H & K 2009     |                                  |                     |                     |                    |                        |      |                        | <i>Elpeytonius</i>               | <i>Aedes (Elpeytonius)</i>       |                                  |                             |
| <i>Empihals</i><br>R, H & K 2008        |                                  |                     |                     |                    |                        |      | <i>Oc. (Empihals)</i>  | Syn. <i>Aedes (Ochlerotatus)</i> |                                  |                                  |                             |
| <i>Eretmapodites</i><br>Theobald 1901   | <i>Eretmapodites</i>             |                     |                     |                    |                        |      |                        |                                  |                                  | <i>Eretmapodites</i>             |                             |
| <i>Finlaya</i><br>Theobald 1903         | <i>Ae. (Fin.)</i>                | <i>Oc. (Fin.)</i>   | <i>Finlaya</i>      |                    |                        |      |                        |                                  |                                  |                                  | <i>Aedes (Finlaya)</i>      |
| <i>Fredwardsius</i><br>Reinert 2000     |                                  | <i>Ae. (Fre.)</i>   | <i>Fredwardsius</i> |                    |                        |      |                        |                                  |                                  |                                  | <i>Aedes (Fredwardsius)</i> |
| <i>Georgecraigius</i><br>R, H & K 2006  |                                  |                     |                     |                    | <i>Georgecraigius</i>  |      |                        |                                  | <i>Aedes (Georgecraigius)</i>    |                                  |                             |
| <i>Geoskusea</i><br>Edwards 1929        | <i>Ae. (Geo.)</i>                | <i>Oc. (Geo.)</i>   | <i>Geoskusea</i>    | <i>Oc. (Geo.)</i>  | <i>Geoskusea</i>       |      |                        |                                  |                                  | <i>Aedes (Geoskusea)</i>         |                             |
| <i>Gilesia</i><br>Theobald 1903         | Syn. Ae. ( <i>Och.</i> )         |                     |                     |                    |                        |      | <i>Oc. (Gilesia)</i>   | Syn. <i>Aedes (Ochlerotatus)</i> |                                  |                                  |                             |
| <i>Gilesius</i><br>R, H & K 2006        |                                  |                     |                     |                    | <i>Gilesius</i>        |      |                        |                                  | <i>Aedes (Gilesius)</i>          |                                  |                             |
| <i>Grabhamia</i><br>Theobald 1903       | <i>Psorophora (Grabhamia)</i>    |                     |                     |                    |                        |      |                        |                                  |                                  | <i>Psorophora (Grabhamia)</i>    |                             |
| <i>Gymnetopa</i><br>Coquillett 1906     | <i>Ae. (Gym.)</i>                | <i>Oc. (Gym.)</i>   | <i>Gymnetopa</i>    |                    |                        |      |                        |                                  |                                  |                                  | <i>Aedes (Gymnetopa)</i>    |
| <i>Haemagogus</i><br>Williston 1896     | <i>Haemagogus</i>                |                     |                     |                    |                        |      |                        |                                  |                                  | <i>Haemagogus</i>                |                             |
| <i>Halaedes</i><br>Belkin 1962          | <i>Ae. (Hal.)</i>                | <i>Oc. (Hal.)</i>   | <i>Halaedes</i>     |                    |                        |      |                        |                                  |                                  |                                  | <i>Aedes (Halaedes)</i>     |
| <i>Heizmannia</i><br>Ludlow 1905        | <i>Heizmannia</i>                |                     |                     |                    |                        |      |                        |                                  |                                  | <i>Heizmannia</i>                |                             |
| <i>Heteraspidion</i><br>R, H & K 2009   |                                  |                     |                     |                    |                        |      |                        | <i>Stegomyia (Heteraspidion)</i> | Syn. <i>Aedes (Stegomyia)</i>    |                                  |                             |

| Aedini valid generic level names              | Pre-2000                         | 2000       | 2003 | 2004                   | 2006                                | 2007       | 2008                 | 2009                         | 2013                               | Herein                         |
|-----------------------------------------------|----------------------------------|------------|------|------------------------|-------------------------------------|------------|----------------------|------------------------------|------------------------------------|--------------------------------|
| <i>Himalaius</i><br>R, H & K 2006             |                                  |            |      |                        | <i>Himalaius</i>                    |            |                      |                              | <i>Aedes (Himalaius)</i>           |                                |
| <i>Hopkinsius</i><br>R, H & K 2008            |                                  |            |      |                        |                                     |            | <i>Hopkinsius</i>    |                              | <i>Aedes (Hopkinsius)</i>          |                                |
| <i>Horsfallius</i><br>R, H & K 2006           |                                  |            |      |                        | <i>Georcecraigius (Horsfallius)</i> |            |                      |                              | Syn. <i>Aedes (Georcecraigius)</i> |                                |
| <i>Howardina</i><br>Theobald 1903             | Ae. (How.)                       | Oc. (How.) |      | <i>Howardina</i>       |                                     |            |                      |                              |                                    | <i>Aedes (Howardina)</i>       |
| <i>Huaedes</i><br>Huang 1968                  | Ae. (Hua.)                       |            |      | <i>Huaedes</i>         |                                     |            |                      |                              |                                    | <i>Aedes (Huaedes)</i>         |
| <i>Huangmyia</i><br>R, H & K 2009             |                                  |            |      |                        |                                     |            |                      | <i>Stegomyia (Huangmyia)</i> | Syn. <i>Aedes (Stegomyia)</i>      |                                |
| <i>Hulecoeteomyia</i><br>Theobald 1904        | Syn. Ae. (Fin.)                  |            |      |                        | <i>Hulecoeteomyia</i>               |            |                      |                              |                                    | <i>Aedes (Hulecoeteomyia)</i>  |
| <i>Indusius</i><br>Edwards 1934               | Ae. (Ind.)                       |            |      | <i>Indusius</i>        |                                     |            |                      |                              |                                    | <i>Aedes (Indusius)</i>        |
| <i>Isoaedes</i><br>Reinert 1979               | Ae. (Isa.)                       |            |      | <i>Isoaedes</i>        |                                     |            |                      |                              |                                    | <i>Aedes (Isoaedes)</i>        |
| <i>Janthinosoma</i><br>Lynch-Arribalzaga 1891 | <i>Psorophora (Janthinosoma)</i> |            |      |                        |                                     |            |                      |                              | <i>Psorophora (Janthinosoma)</i>   |                                |
| <i>Jarnellius</i><br>R, H & K 2006            |                                  |            |      |                        | <i>Jarnellius</i>                   |            |                      |                              | <i>Aedes (Jarnellius)</i>          |                                |
| <i>Jihlienius</i><br>R, H & K 2006            |                                  |            |      |                        | <i>Jihlienius</i>                   |            |                      |                              | <i>Aedes (Jihlienius)</i>          |                                |
| <i>Juppius</i><br>R, H & K 2009               |                                  |            |      |                        |                                     |            |                      | <i>Oc. (Juppius)</i>         | Syn. <i>Aedes (Ochlerotatus)</i>   |                                |
| <i>Kenknightia</i><br>Reinert 1990            | Ae. (Ken.)                       | Oc. (Ken.) |      | <i>Kenknightia</i>     |                                     |            |                      |                              |                                    | <i>Aedes (Kenknightia)</i>     |
| <i>Kompia</i><br>Aitken 1941                  | Ae. (Kom.)                       | Oc. (Kom.) |      | <i>Kompia</i>          |                                     |            |                      |                              |                                    | <i>Aedes (Kompia)</i>          |
| <i>Leicesteria</i><br>Theobald 1904           | <i>Armigeres (Leicesteria)</i>   |            |      |                        |                                     |            |                      |                              | <i>Armigeres (Leicesteria)</i>     |                                |
| <i>Lepidokeneon</i><br>R, H & K 2009          |                                  |            |      |                        |                                     |            |                      | <i>Oc. (Lepidokeneon)</i>    | Syn. <i>Aedes (Ochlerotatus)</i>   |                                |
| <i>Leptosomatomyia</i><br>Theobald 1905       | Ae. (Lep.)                       |            |      | <i>Leptosomatomyia</i> |                                     |            |                      |                              |                                    | <i>Aedes (Leptosomatomyia)</i> |
| <i>Levua</i> Stone & Bohart 1944              | Ae. (Lev.)                       | Oc. (Lev.) |      | <i>Levua</i>           |                                     | Oc. (Lev.) |                      | <i>Levua</i>                 |                                    | <i>Aedes (Levua)</i>           |
| <i>Lewnielsenius</i><br>R, H & K 2006         |                                  |            |      |                        | <i>Jarnellius (Lew.)</i>            |            | <i>Lewnielsenius</i> |                              | <i>Aedes (Lewnielsenius)</i>       |                                |
| <i>Lorrainea</i><br>Belkin 1962               | Ae. (Lor.)                       |            |      | <i>Lorrainea</i>       |                                     |            |                      |                              |                                    | <i>Aedes (Lorrainea)</i>       |
| <i>Luius</i><br>R, H & K 2008                 |                                  |            |      |                        |                                     |            | <i>Luius</i>         |                              | <i>Aedes (Luius)</i>               |                                |
| <i>Macleaya</i><br>Theobald 1903              | Ae. (Mac.)                       | Oc. (Mac.) |      | <i>Macleaya</i>        |                                     |            |                      |                              |                                    | <i>Aedes (Macleaya)</i>        |
| <i>Mattinglyia</i><br>Lien 1968               | <i>Heizmannia (Mattinglyia)</i>  |            |      |                        |                                     |            |                      |                              | <i>Heizmannia (Mattinglyia)</i>    |                                |
| <i>Molpemyia</i><br>Theobald 1910             | Syn. Ae. (Fin.)                  | Oc. (Mol.) |      |                        | <i>Molpeymia</i>                    |            |                      |                              | <i>Aedes (Molpemyia)</i>           |                                |
| <i>Mucidus</i><br>Theobald 1901               | Ae. (Muc.)                       | Oc. (Muc.) |      | <i>Mucidus</i>         |                                     |            |                      |                              |                                    | <i>Aedes (Mucidus)</i>         |

| Aedini valid generic level names               | Pre-2000                                 | 2000                                | 2003                   | 2004                                | 2006                       | 2007 | 2008                             | 2009                                         | 2013                                         | Herein                                      |
|------------------------------------------------|------------------------------------------|-------------------------------------|------------------------|-------------------------------------|----------------------------|------|----------------------------------|----------------------------------------------|----------------------------------------------|---------------------------------------------|
| <i>Mukwaya</i><br>R, H & K 2009                |                                          |                                     |                        |                                     |                            |      |                                  | <i>Stegomyia</i><br>( <i>Mukwaya</i> )       | Syn. <i>Aedes</i><br>( <i>Stegomyia</i> )    |                                             |
| <i>Neomacleaya</i><br>Theobald 1907            | <i>Verrallina</i> ( <i>Neomacleaya</i> ) |                                     |                        |                                     |                            |      |                                  |                                              |                                              | <i>Verrallina</i><br>( <i>Neomacleaya</i> ) |
| <i>Neomelanoconion</i><br>Newstead 1907        | <i>Ae.</i> ( <i>Neo.</i> )               |                                     | <i>Neomelanoconion</i> |                                     |                            |      |                                  |                                              |                                              | <i>Aedes</i><br>( <i>Neomelanoconion</i> )  |
| <i>Nothoskusea</i><br>Dumbleton 1962           | <i>Ae.</i><br>( <i>Not.</i> )            | <i>Oc.</i> ( <i>Not.</i> )          |                        | <i>Opifex</i> ( <i>Not.</i> )       |                            |      |                                  |                                              | <i>Opifex</i> ( <i>Nothoskusea</i> )         |                                             |
| <i>Nyctomyia</i> Harbach<br>& Linton 2013      |                                          |                                     |                        |                                     |                            |      |                                  | <i>Nyctomyia</i> *                           | <i>Aedes</i> ( <i>Nyctomyia</i> )            |                                             |
| <i>Ochlerotatus</i> Lynch-<br>Arribalzaga 1891 | <i>Ae.</i><br>( <i>Och.</i> )            | <i>Ochlerotatus</i>                 |                        |                                     |                            |      |                                  |                                              | <i>Aedes</i> ( <i>Ochlerotatus</i> )         |                                             |
| <i>Opifex</i><br>Hutton 1902                   | <i>Opifex</i>                            |                                     |                        |                                     |                            |      |                                  |                                              |                                              | <i>Opifex</i>                               |
| <i>Paraedes</i><br>Edwards 1934                | <i>Ae.</i> ( <i>Par.</i> )               |                                     | <i>Paraedes</i>        |                                     |                            |      |                                  |                                              |                                              | <i>Aedes</i> ( <i>Paraedes</i> )            |
| <i>Pardomyia</i><br>Theobald 1907              | Syn. <i>Ae.</i> ( <i>Muc.</i> )          |                                     |                        | <i>Mucidus</i> ( <i>Pardomyia</i> ) |                            |      |                                  |                                              | Syn. <i>Aedes</i> ( <i>Mucidus</i> )         |                                             |
| <i>Patmarksia</i><br>R, H & K 2006             |                                          |                                     |                        | <i>Patmarksia</i>                   |                            |      |                                  |                                              | <i>Aedes</i> ( <i>Patmarksia</i> )           |                                             |
| <i>Petermattinglius</i><br>R, H & K 2009       |                                          |                                     |                        |                                     |                            |      |                                  | <i>Petermattinglius</i>                      | <i>Aedes</i><br>( <i>Petermattinglius</i> )  |                                             |
| <i>Phagomyia</i><br>Theobald 1905              | Syn. <i>Ae.</i> ( <i>Fin.</i> )          |                                     |                        | <i>Phagomyia</i>                    |                            |      |                                  |                                              | <i>Aedes</i> ( <i>Phagomyia</i> )            |                                             |
| <i>Pholeomyia</i><br>R, H & K 2008             |                                          |                                     |                        |                                     |                            |      | <i>Oc.</i> ( <i>Pholeomyia</i> ) | Syn. <i>Aedes</i><br>( <i>Ochlerotatus</i> ) |                                              |                                             |
| <i>Polyleptomyia</i><br>Theobald 1905          | Syn. <i>Ae.</i> ( <i>Adm.</i> )          |                                     |                        |                                     |                            |      |                                  | <i>Polyleptomyia</i>                         | <i>Aedes</i><br>( <i>Polyleptomyia</i> )     |                                             |
| <i>Protoculex</i><br>Felt 1904                 | Syn. <i>Ae.</i> ( <i>Och.</i> )          |                                     |                        |                                     |                            |      | <i>Oc.</i> ( <i>Protoculex</i> ) | Syn. <i>Aedes</i><br>( <i>Ochlerotatus</i> ) |                                              |                                             |
| <i>Protomacleaya</i><br>Theobald 1907          | <i>Ae.</i><br>( <i>Pro.</i> )            | <i>Oc.</i> ( <i>Protomacleaya</i> ) |                        |                                     |                            |      |                                  |                                              | Syn. <i>Aedes</i><br>( <i>Ochlerotatus</i> ) |                                             |
| <i>Pseudarmigeres</i><br>Stone & Knight 1956   | <i>Ae.</i> ( <i>Pse.</i> )               |                                     | <i>Pseudarmigeres</i>  |                                     |                            |      |                                  |                                              |                                              | <i>Aedes</i><br>( <i>Pseudarmigeres</i> )   |
| <i>Pseudoskusea</i><br>Theobald 1907           | <i>Ae.</i><br>( <i>Psk.</i> )            | <i>Oc.</i> ( <i>Psk.</i> )          |                        | <i>Pseudoskusea</i>                 | <i>Oc.</i> ( <i>Psk.</i> ) |      |                                  |                                              | Syn. <i>Aedes</i><br>( <i>Ochlerotatus</i> ) |                                             |
| <i>Psorophora</i><br>R-D 1827                  | <i>Psorophora</i>                        |                                     |                        |                                     |                            |      |                                  |                                              |                                              | <i>Psorophora</i>                           |
| <i>Rampamyia</i><br>R, H & K 2006              |                                          |                                     |                        | <i>Rampamyia</i>                    |                            |      |                                  |                                              | <i>Aedes</i> ( <i>Rampamyia</i> )            |                                             |
| <i>Rhinoskusea</i><br>Edwards 1929             | <i>Ae.</i><br>( <i>Rhi.</i> )            | <i>Oc.</i> ( <i>Rhi.</i> )          |                        | <i>Rhinoskusea</i>                  |                            |      |                                  |                                              | <i>Aedes</i> ( <i>Rhinoskusea</i> )          |                                             |
| <i>Rusticoidus</i><br>S & P 1973               | <i>Ae.</i><br>( <i>Rus.</i> )            | <i>Oc.</i> ( <i>Rus.</i> )          |                        |                                     |                            |      |                                  |                                              | Syn. <i>Aedes</i><br>( <i>Ochlerotatus</i> ) |                                             |
| <i>Sallumia</i><br>R, H & K 2008               |                                          |                                     |                        |                                     |                            |      | <i>Oc.</i><br>( <i>Sal.</i> )    | <i>Sallumia</i>                              | <i>Aedes</i> ( <i>Sallumia</i> )             |                                             |
| <i>Scutomya</i><br>Theobald 1904               | Syn. <i>Ae.</i> ( <i>Stg.</i> )          |                                     |                        | <i>Scutomya</i>                     |                            |      |                                  |                                              | <i>Aedes</i> ( <i>Scutomya</i> )             |                                             |
| <i>Skusea</i><br>Theobald 1903                 | <i>Ae.</i> ( <i>Sku.</i> )               |                                     | <i>Skusea</i>          |                                     |                            |      |                                  |                                              |                                              | <i>Aedes</i> ( <i>Skusea</i> )              |

| Aedini valid generic level names      | Pre-2000   | 2000       | 2003 | 2004                 | 2006 | 2007 | 2008 | 2009 | 2013 | Herein                            |                                  |
|---------------------------------------|------------|------------|------|----------------------|------|------|------|------|------|-----------------------------------|----------------------------------|
| <i>Stegomyia</i><br>Theobald 1901     | Ae. (Stg.) |            |      | <i>Stegomyia</i>     |      |      |      |      |      | <i>Aedes (Stegomyia)</i>          |                                  |
| <i>Tanakius</i><br>R, H & K 2004      |            |            |      | <i>Tanakius</i>      |      |      |      |      |      | <i>Aedes (Tanakius)</i>           |                                  |
| <i>Tewarius</i><br>R, H & K 2006      |            |            |      | <i>Tewarius</i>      |      |      |      |      |      | <i>Aedes (Tewarius)</i>           |                                  |
| <i>Udaya</i><br>Thurman 1954          |            |            |      | <i>Udaya</i>         |      |      |      |      |      | <i>Udaya</i>                      |                                  |
| <i>Vansomerensis</i><br>R, H & K 2006 |            |            |      | <i>Vansomerensis</i> |      |      |      |      |      | <i>Aedes (Vansomerensis)</i>      |                                  |
| <i>Verrallina</i><br>Theobald 1903    |            |            |      | <i>Verrallina</i>    |      |      |      |      |      | <i>Verrallina</i>                 |                                  |
| <i>Woodius</i><br>R, H & K 2009       |            |            |      |                      |      |      |      |      |      | Oc. ( <i>Woodius</i> )            | Syn. <i>Aedes (Ochlerotatus)</i> |
| <i>Xyele</i><br>R, H & K 2009         |            |            |      |                      |      |      |      |      |      | <i>Stegomyia (Xyele)</i>          | Syn. <i>Aedes (Stegomyia)</i>    |
| <i>Yamada</i><br>R, H & K 2008        |            |            |      |                      |      |      |      |      |      | <i>Hopkinsinsius (Yamada)</i>     | Syn. <i>Aedes (Hopkinsius)</i>   |
| <i>Zavortinkius</i><br>Reinert 1999   | Ae. (Zav.) | Oc. (Zav.) |      | <i>Zavortinkius</i>  |      |      |      |      |      | <i>Aedes (Zavortinkius)</i>       |                                  |
| <i>Zeugomyia</i><br>Leicester 1908    |            |            |      | <i>Zeugomyia</i>     |      |      |      |      |      | <i>Zeugomyia</i>                  |                                  |
| <i>Zoomorphus</i><br>R, H & K 2009    |            |            |      |                      |      |      |      |      |      | <i>Ochlerotatus (Zoromorphus)</i> | Syn. <i>Aedes (Ochlerotatus)</i> |
