# Supplementary material for: Making Mosquito Taxonomy Useful: A Stable Classification of Tribe Aedini that Balances Utility with Current Knowledge of Evolutionary Relationships
Source: PubMed Central journal article supplement (PMC4520491; doi:10.1371/journal.pone.0133602), 2015-07-30

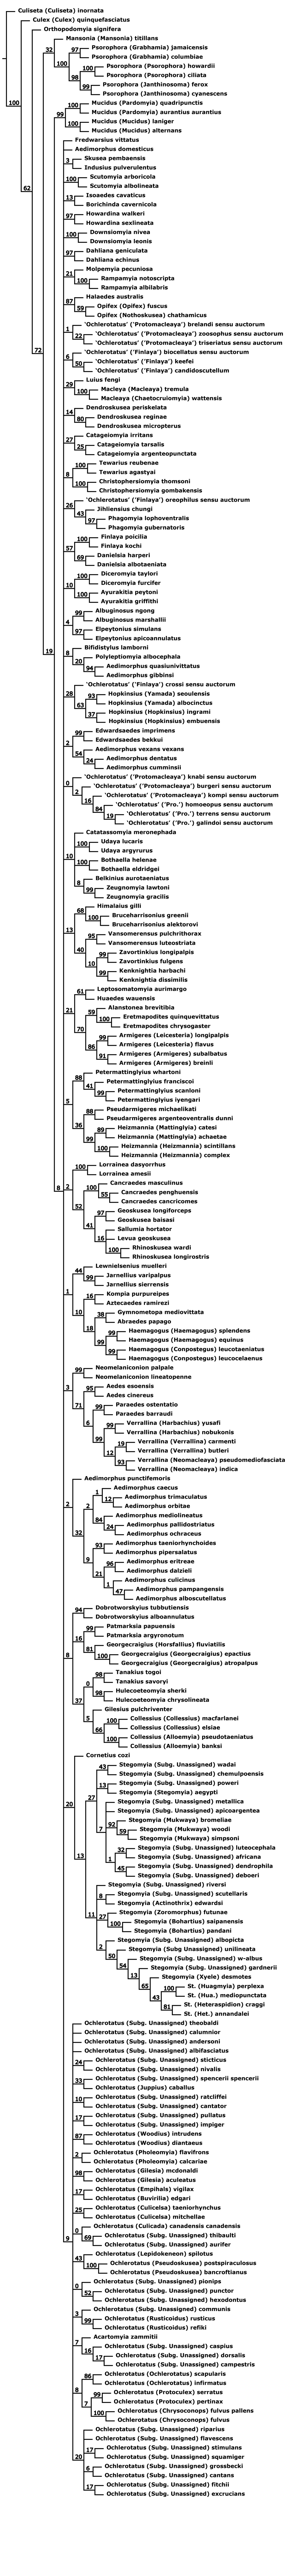

Supplement: pone.0133602.s005.pdf [file pone.0133602.s005.pdf]
