# Supplementary material for: Making Mosquito Taxonomy Useful: A Stable Classification of Tribe Aedini that Balances Utility with Current Knowledge of Evolutionary Relationships
Source: PubMed Central journal article supplement (PMC4520491; doi:10.1371/journal.pone.0133602), 2015-07-30

Aedini, 14 characters ordered, strict consensus of 4000 MPTs, L=6654

Strict consensus tree

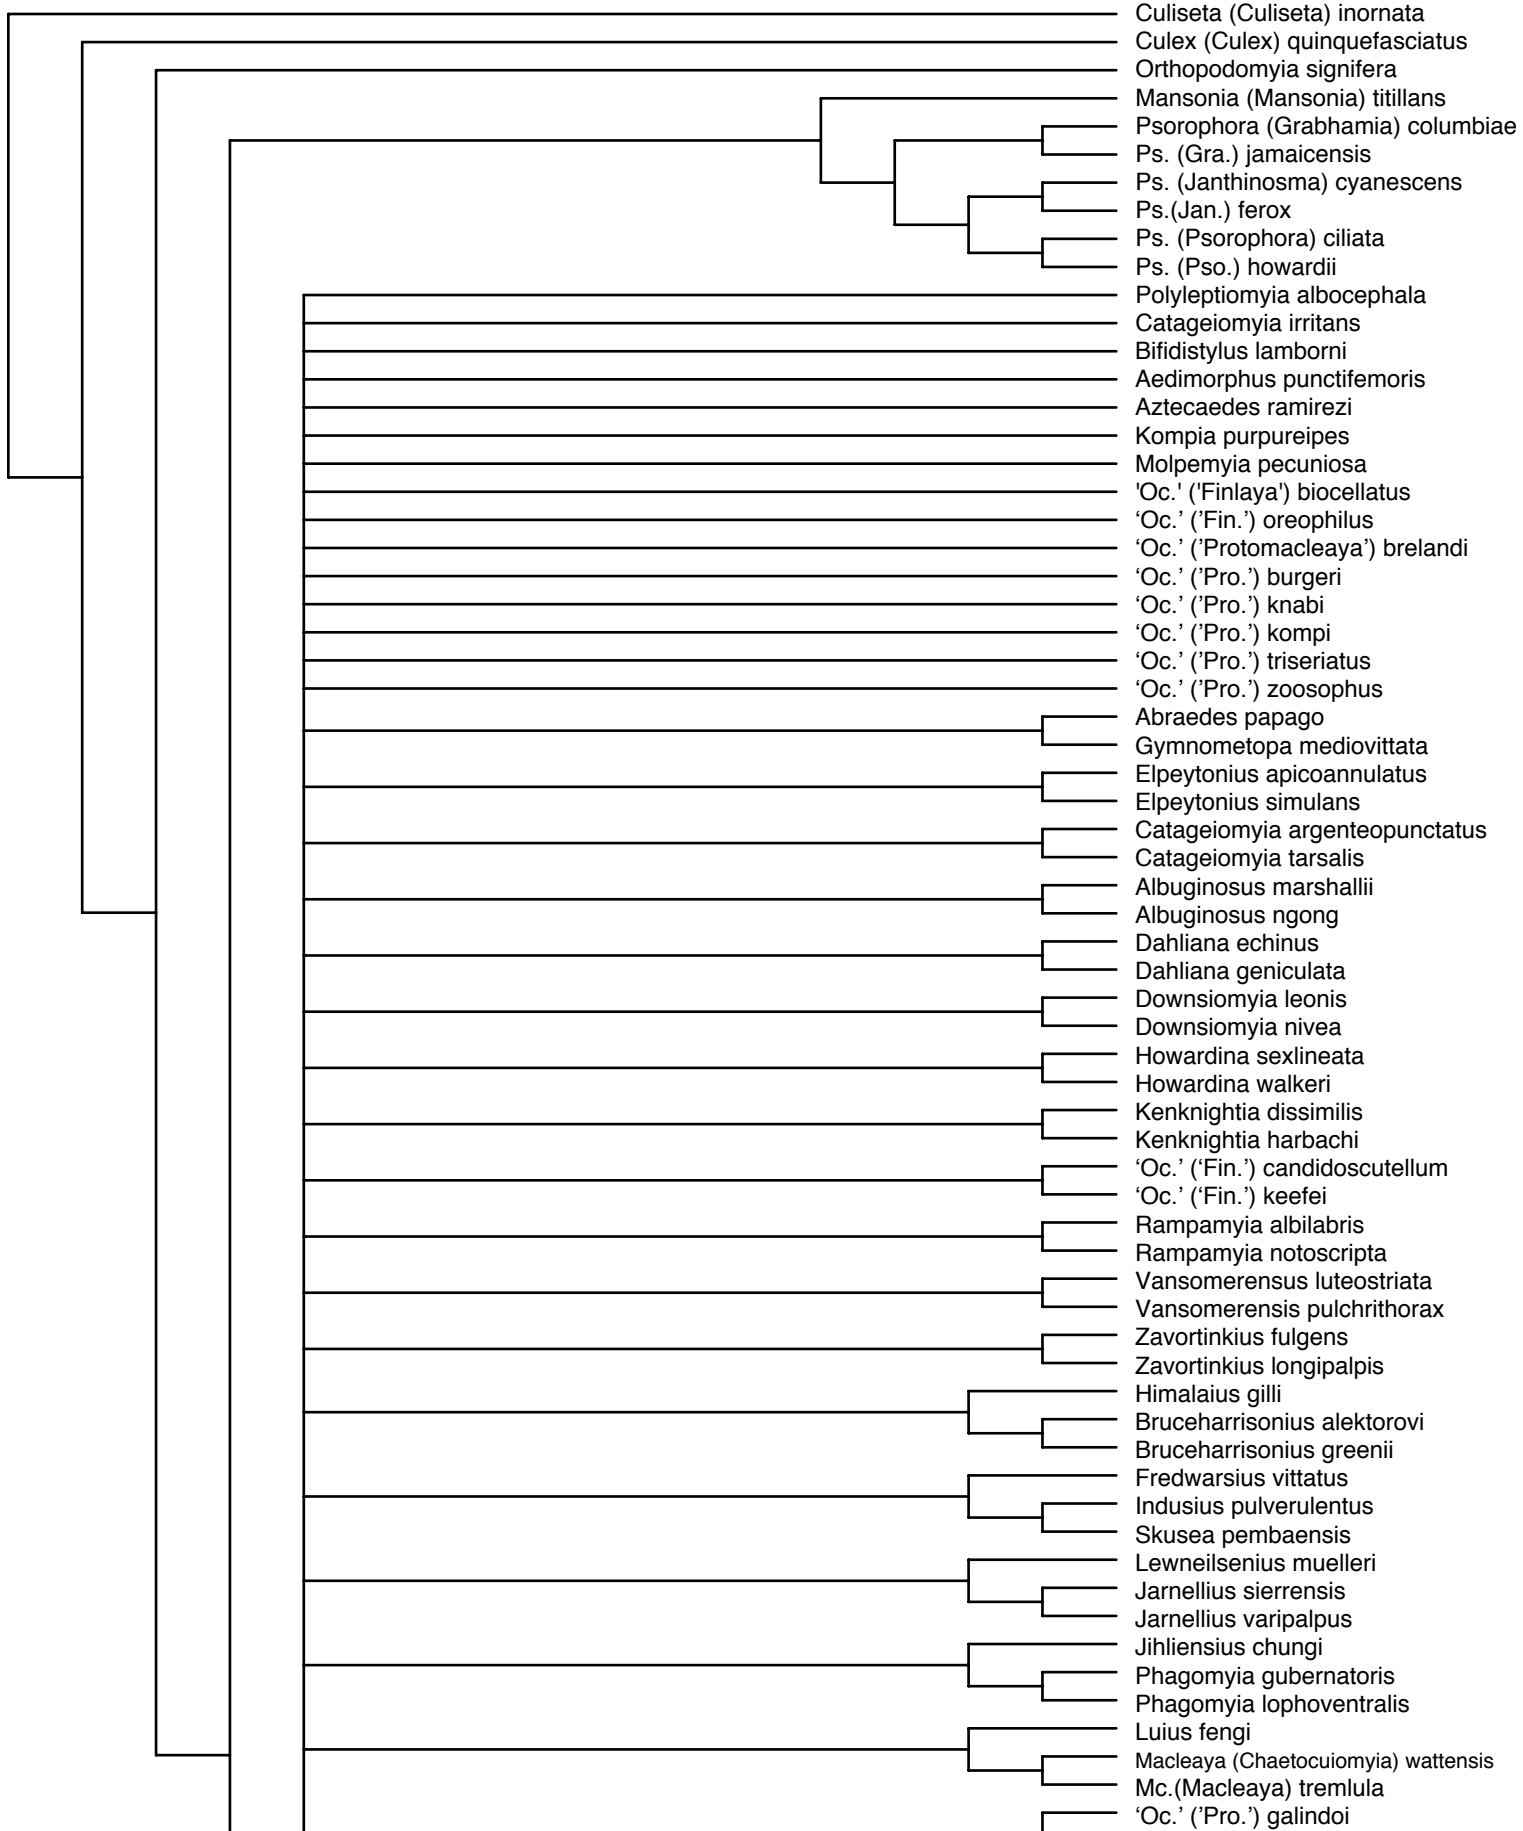

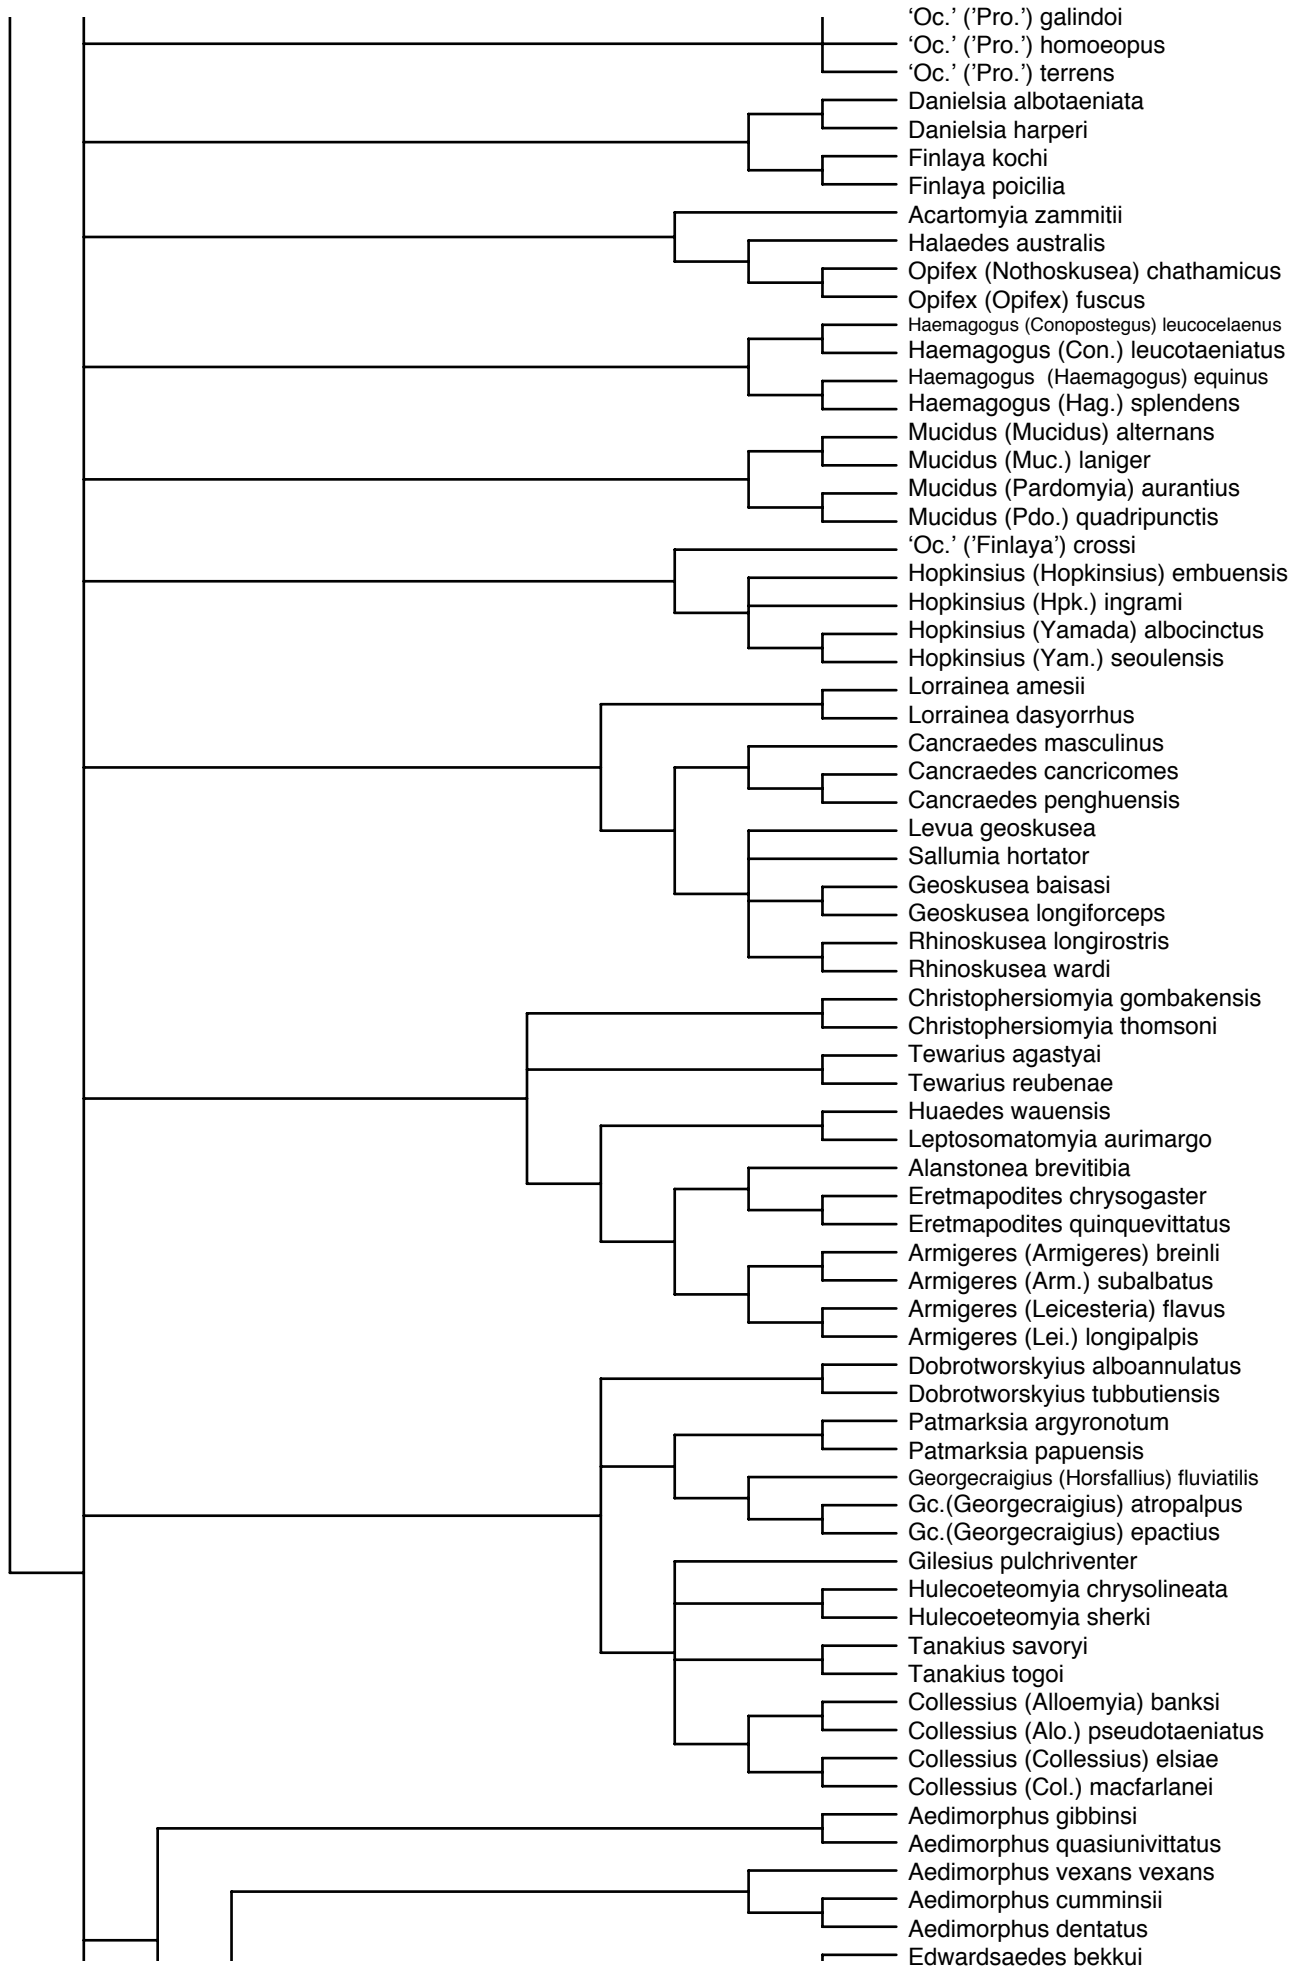

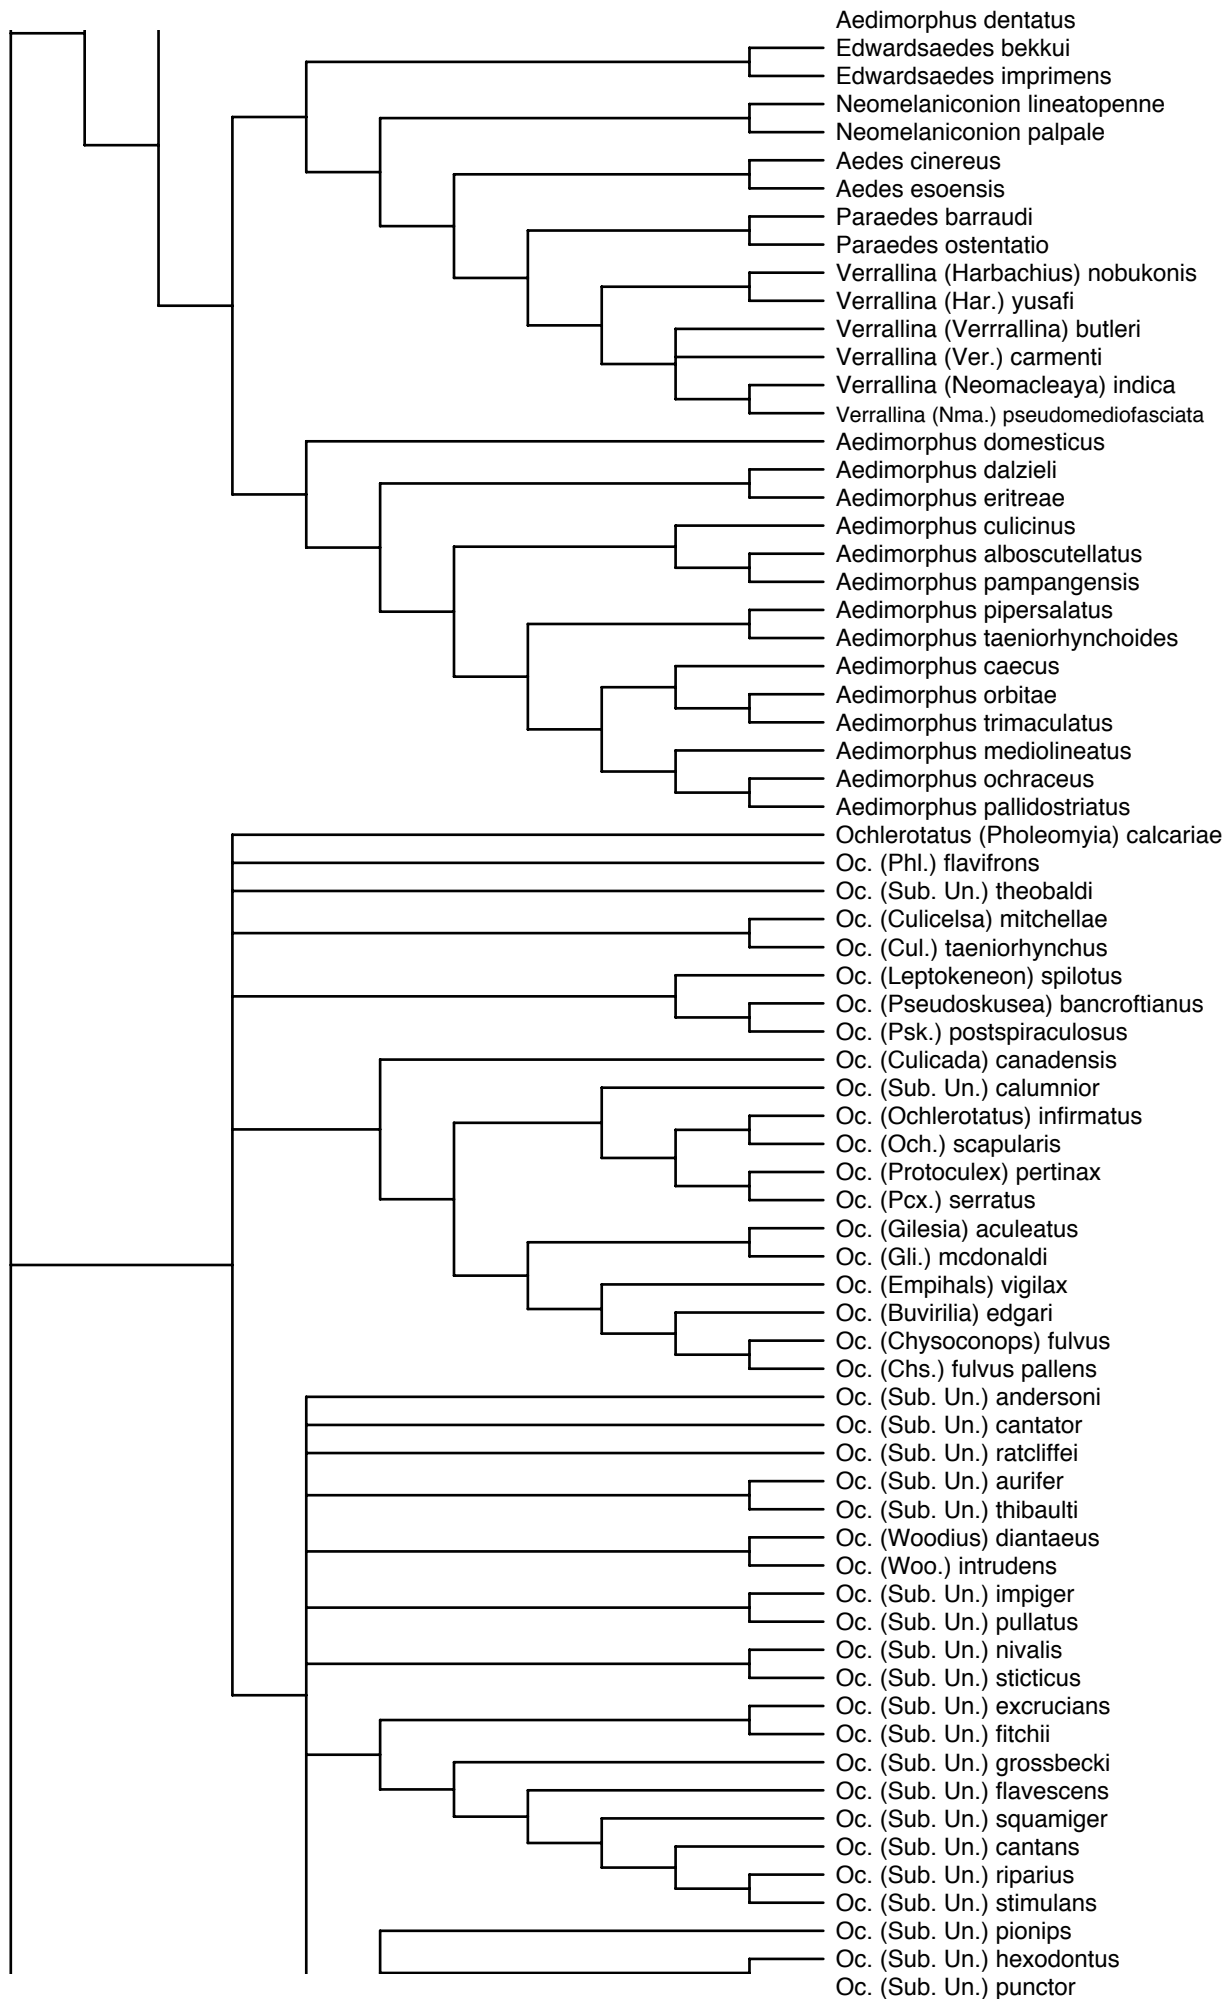

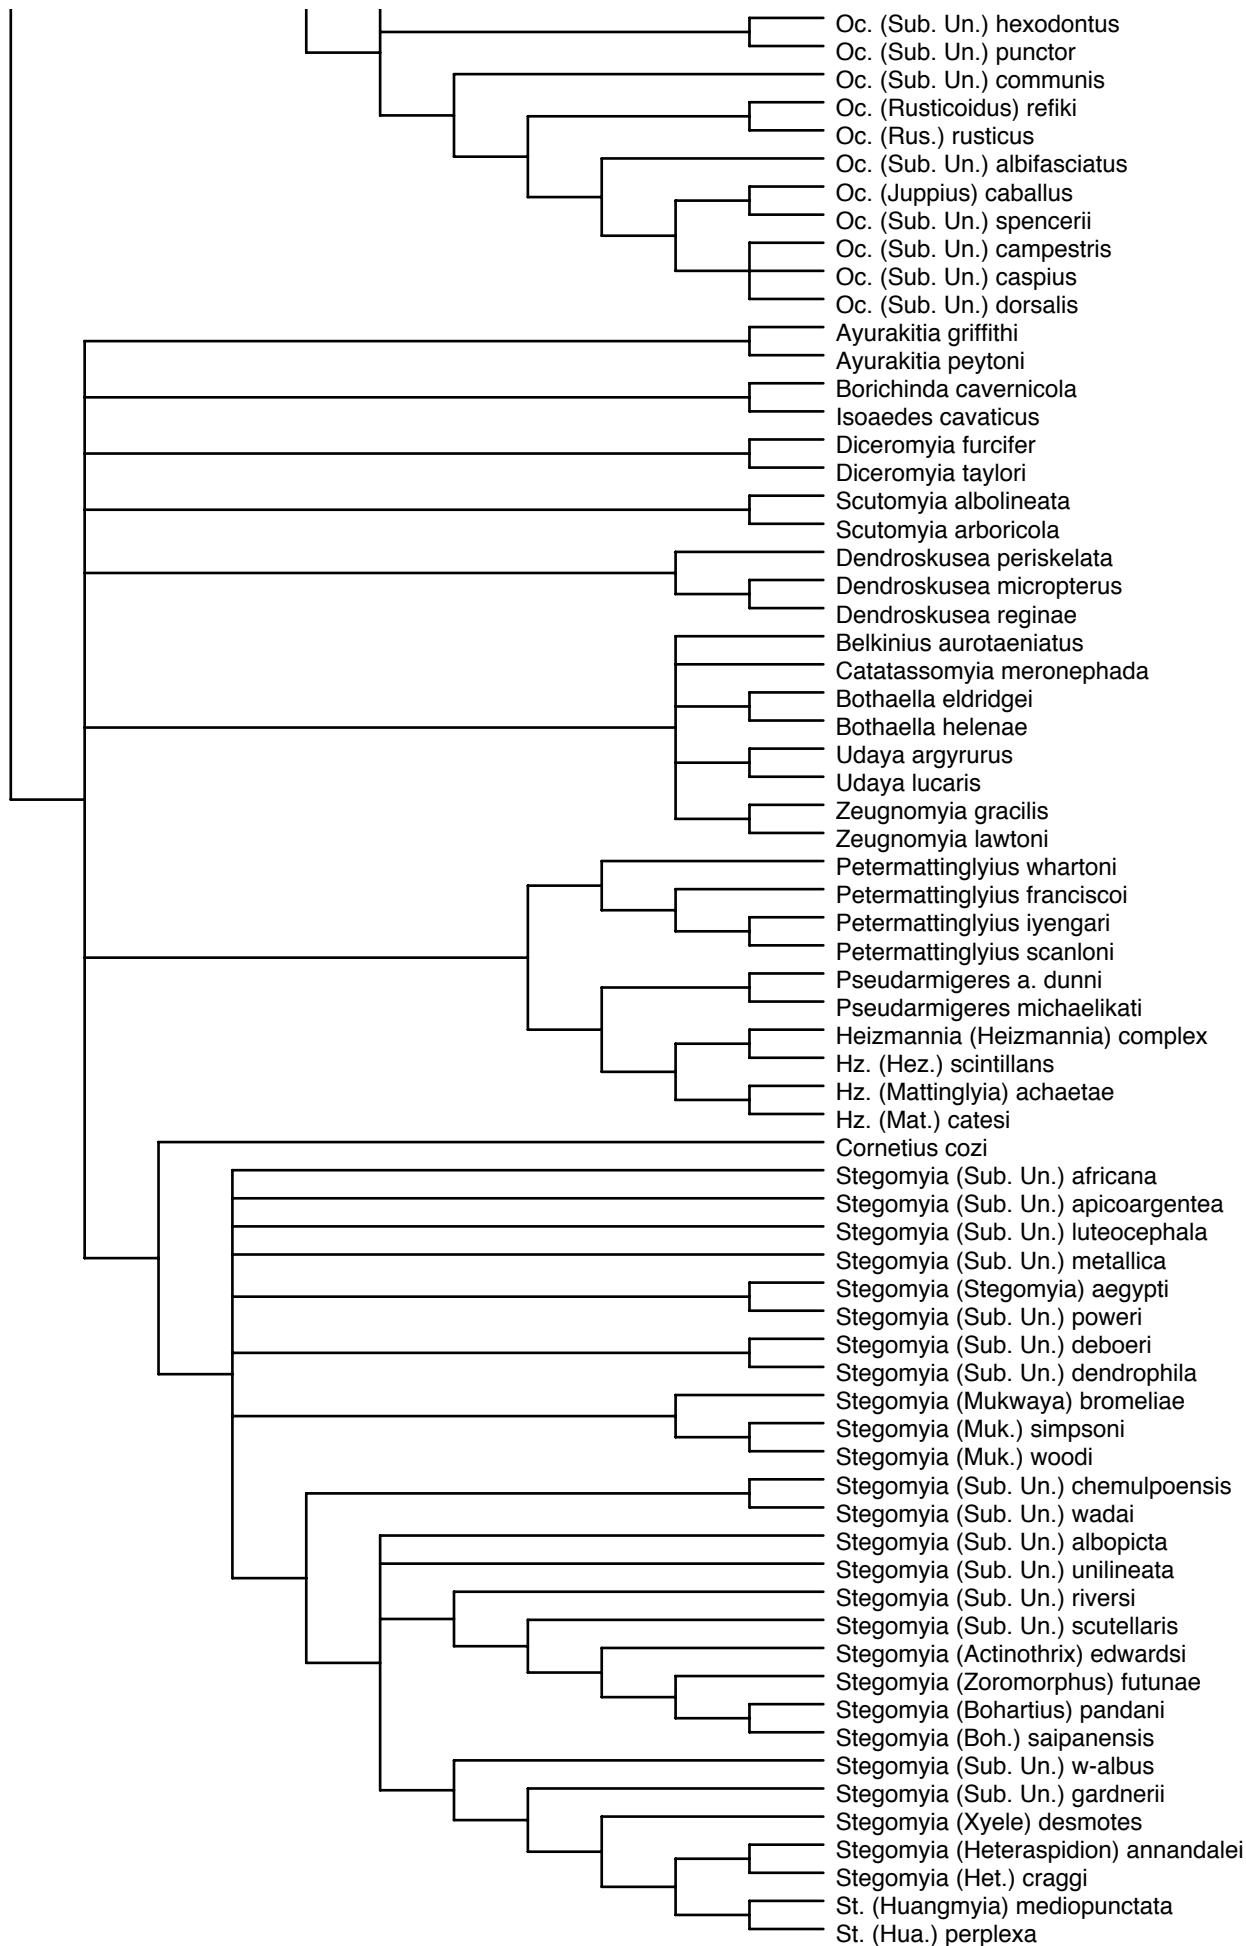

Supplement: pone.0133602.s007.pdf [file pone.0133602.s007.pdf]
